# Supplementary material for: Design of coiled-coil N-peptides against HIV-1 based on a CADD strategy
Source: Royal Society of Chemistry journal article supplement (doi:10.1039/d4ob01620c), 2024-10-31
Supplement: d4ob01620c9.pdf [file d4ob01620c9.pdf]

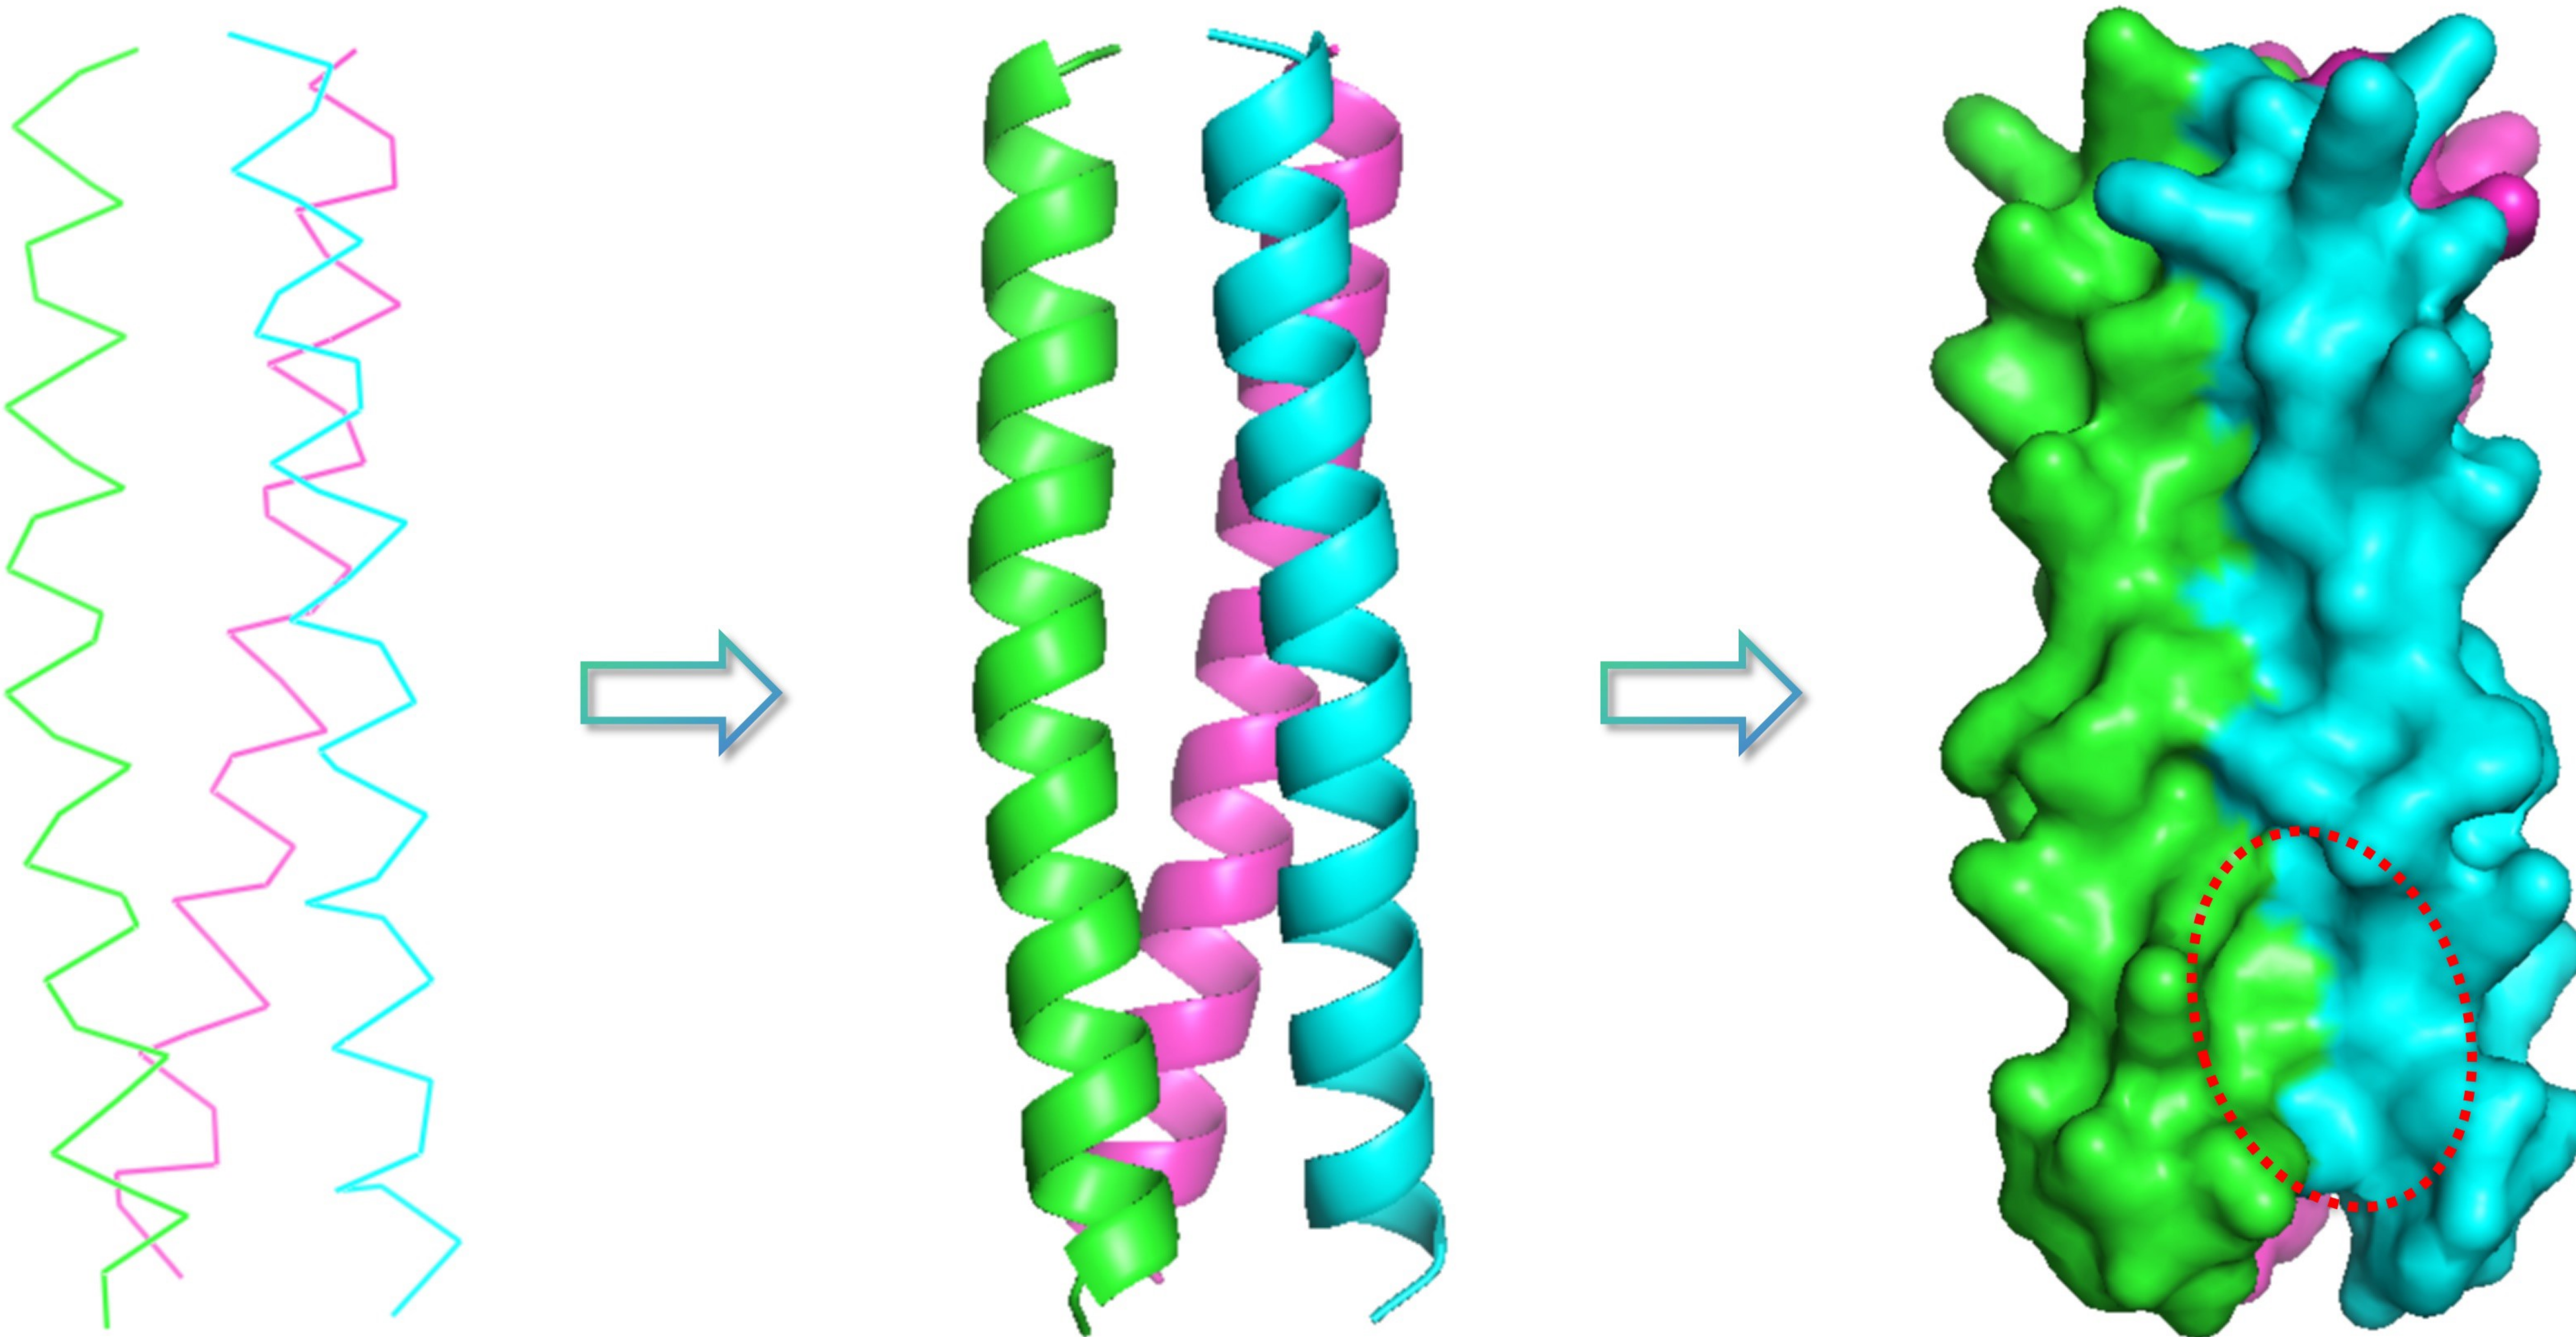

---

IKKK IEAIEKA IEAQQHL LEQTVKG IKQLQER IL

---

IZNP01EQ IKKK IEAIEKA IEAQQHL LEQTVKG IKQLQER IL

---

IKKK IEAIEKA IEAQQHL LEQTVKG IKQLQER IL

---
