# Supplementary material for: Design of coiled-coil N-peptides against HIV-1 based on a CADD strategy
Source: Royal Society of Chemistry journal article supplement (doi:10.1039/d4ob01620c), 2024-10-31
Supplement: d4ob01620c11.pdf [file d4ob01620c11.pdf]

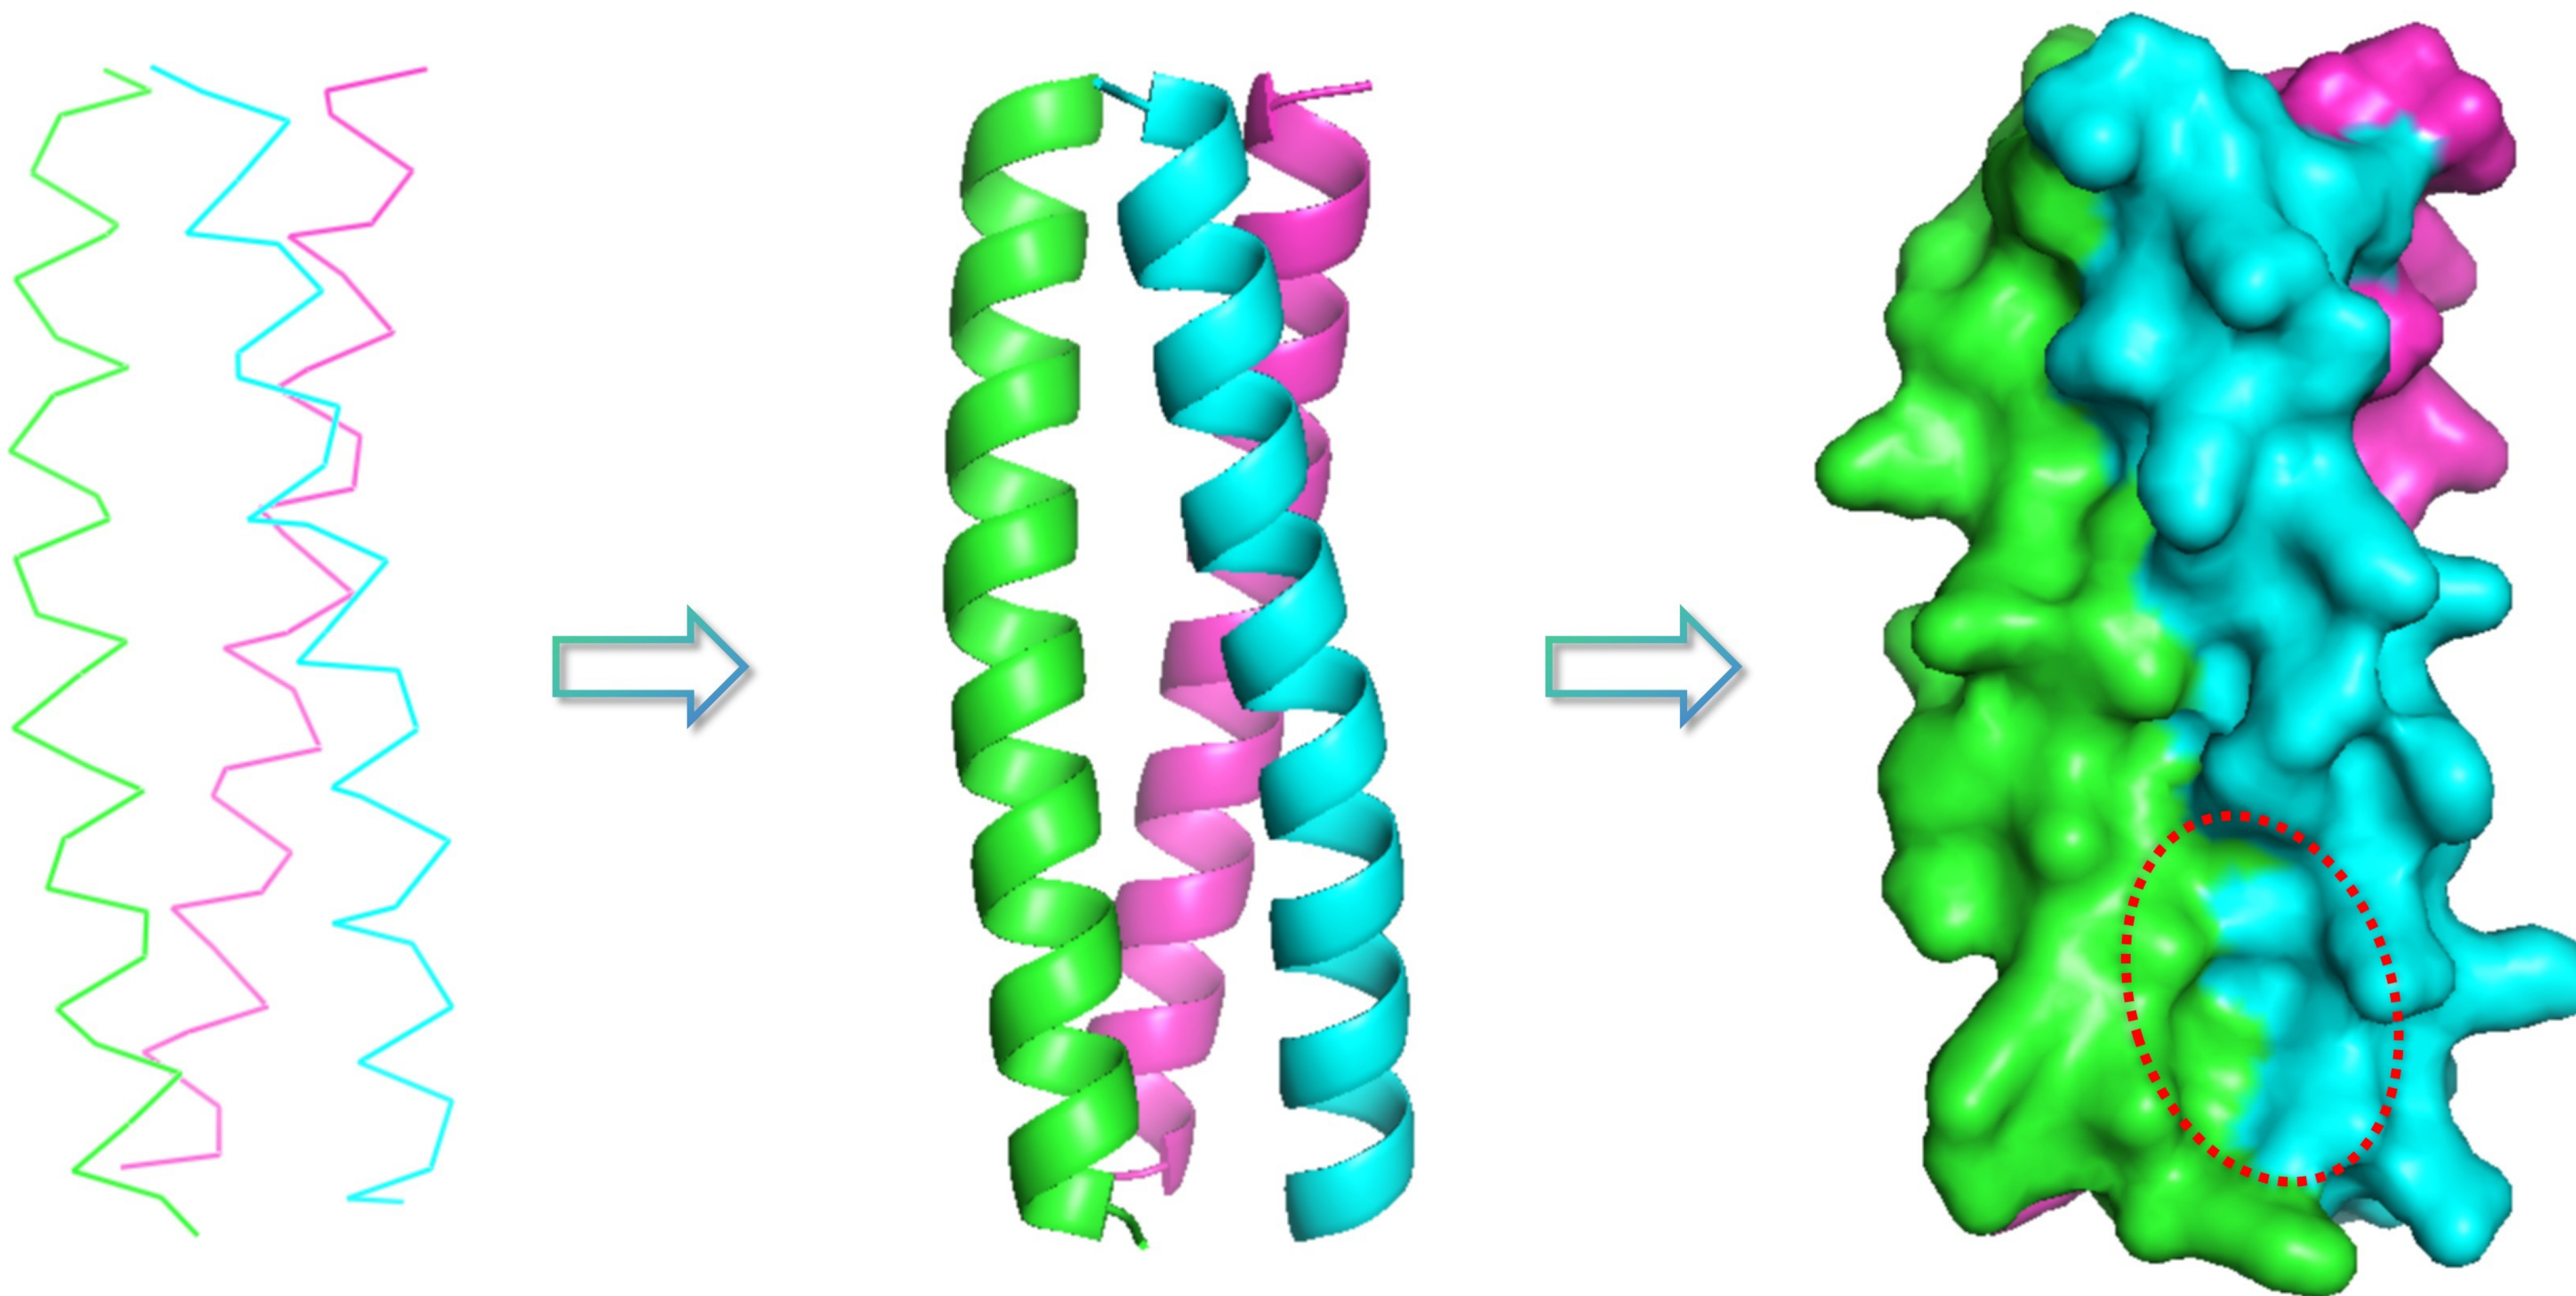

---

IKKK IEAIEKA IEAQQHL IEQIVKG IKQIQER IL  
-----  
IZNP03EQ IKKK IEAIEKA IEAQQHL IEQIVKG IKQIQER IL  
-----  
IKKK IEAIEKA IEAQQHL IEQIVKG IKQIQER IL

---
