# Supplementary material for: Design of coiled-coil N-peptides against HIV-1 based on a CADD strategy
Source: Royal Society of Chemistry journal article supplement (doi:10.1039/d4ob01620c), 2024-10-31
Supplement: d4ob01620c12.pdf [file d4ob01620c12.pdf]

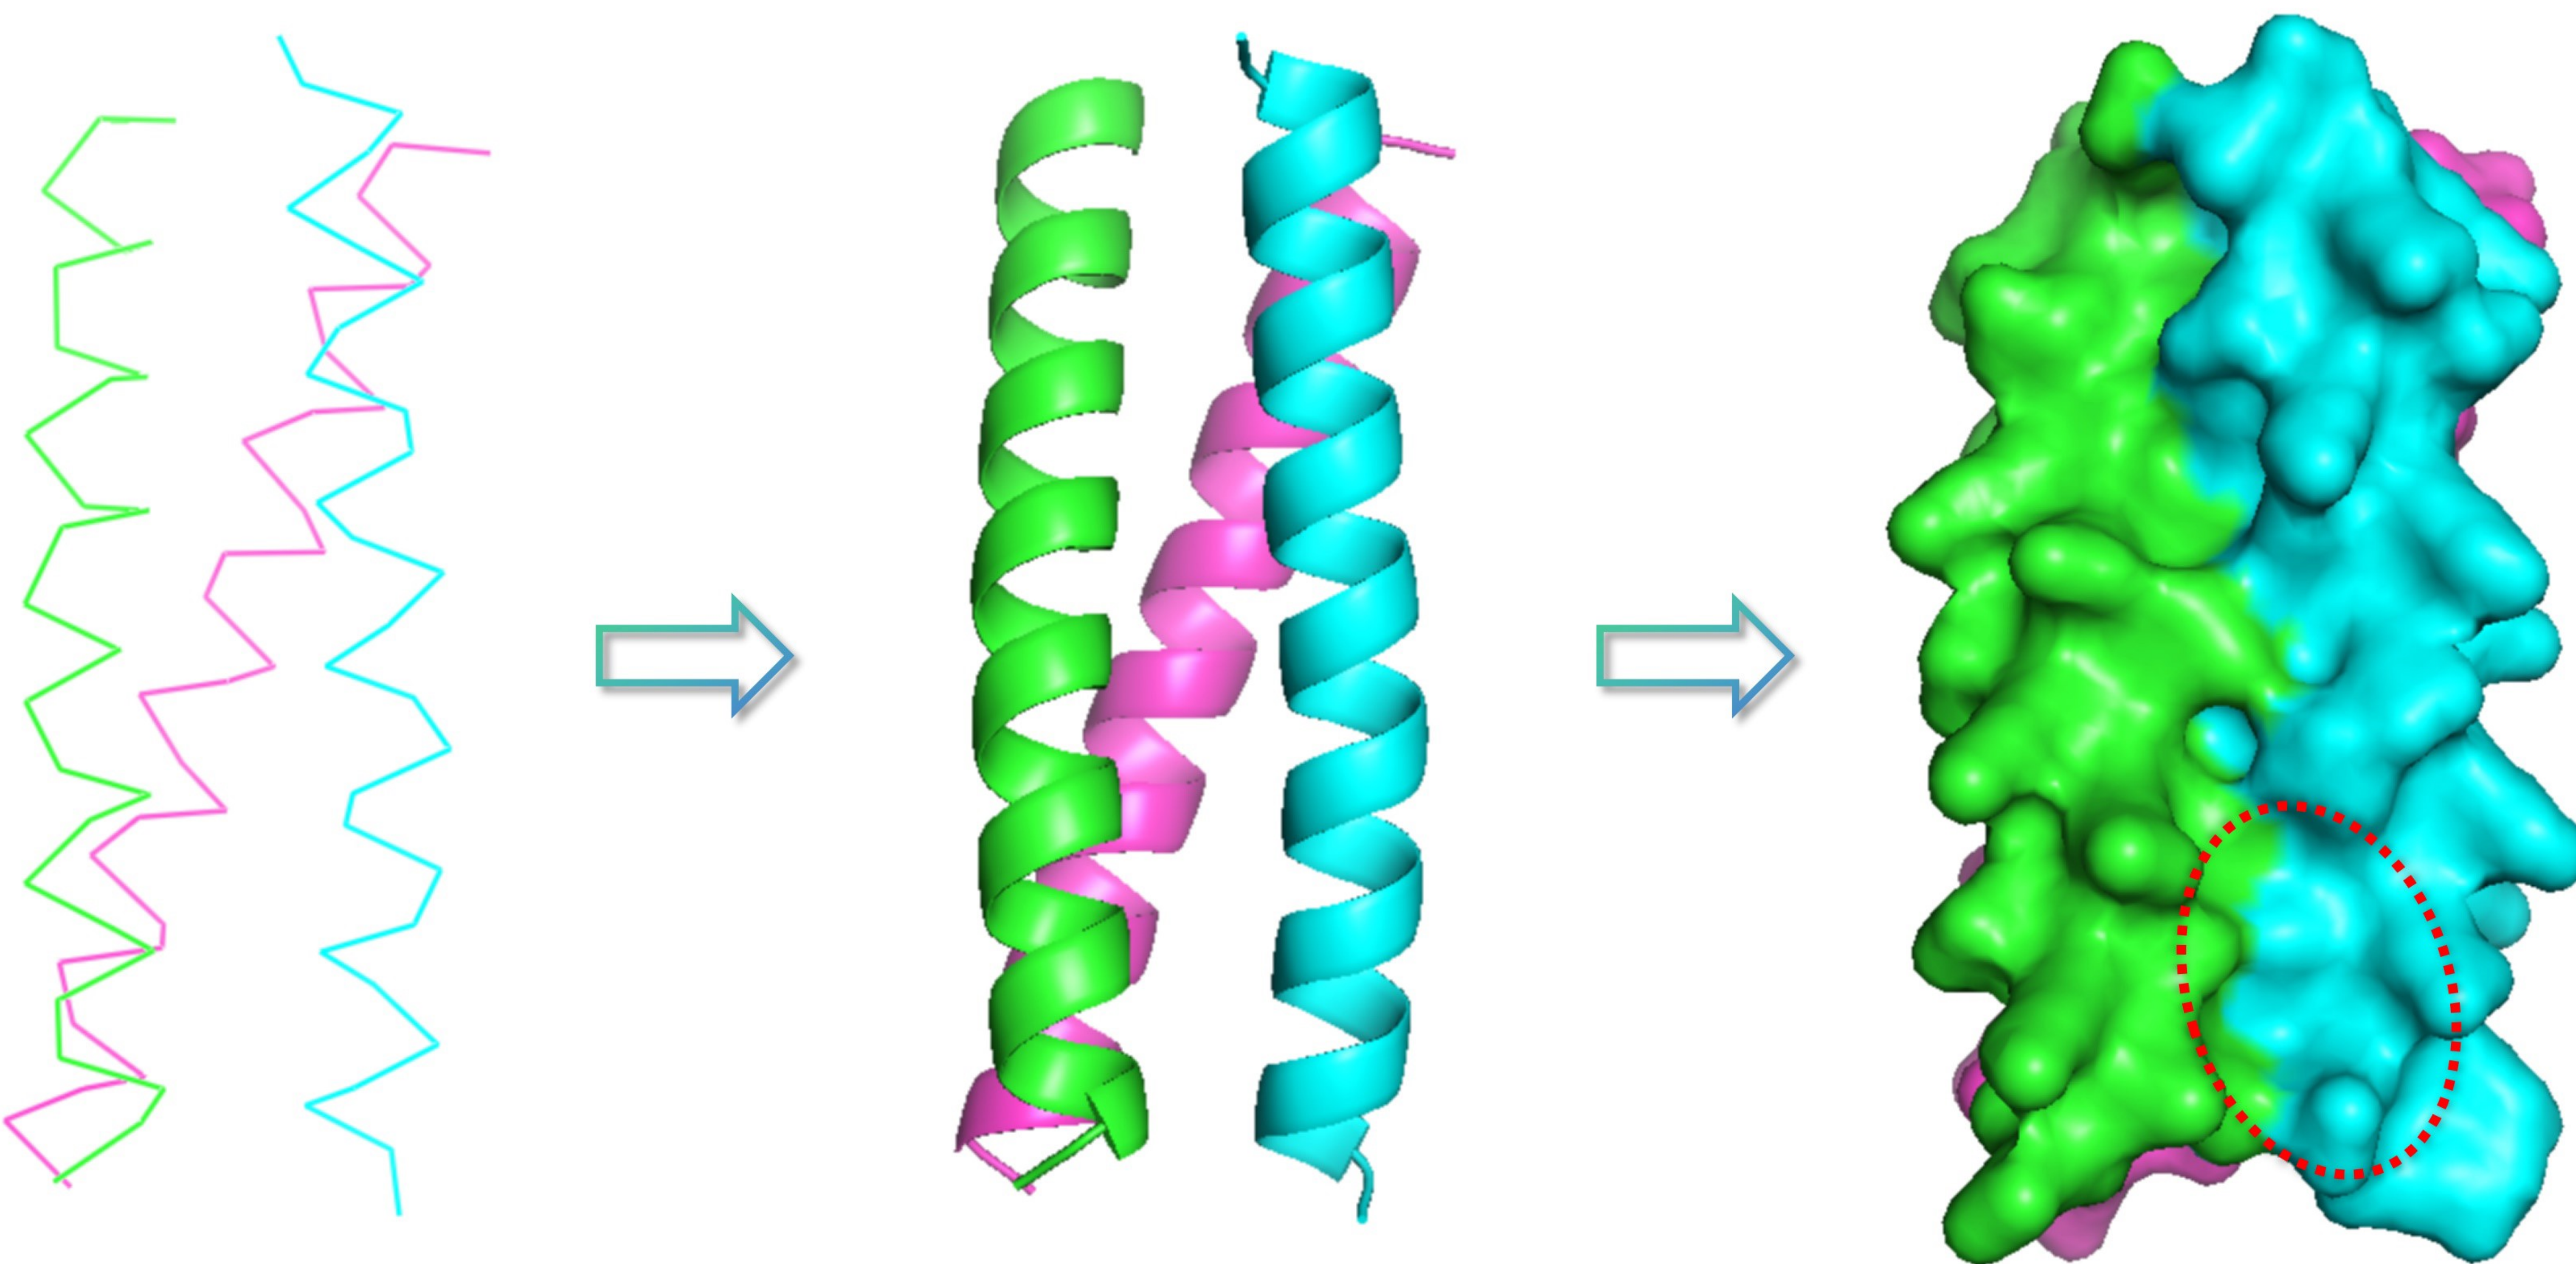

---

|          |                                         |
|----------|-----------------------------------------|
|          | IKKK IEAIEKA IEQIQKL IEQIVKG IKQIQER IL |
| IZNP04EQ | IKKK IEAIEKA IEQIQKL IEQIVKG IKQIQER IL |
|          | IKKK IEAIEKA IEQIQKL IEQIVKG IKQIQER IL |

---
