# Supplementary material for: Design of coiled-coil N-peptides against HIV-1 based on a CADD strategy
Source: Royal Society of Chemistry journal article supplement (doi:10.1039/d4ob01620c), 2024-10-31
Supplement: d4ob01620c14.pdf [file d4ob01620c14.pdf]

## Supporting Information

### Design of the coiled-coil N-peptide against HIV-1 based on the CADD strategy

Yan Huang<sup>1,#</sup>, Hui Luo<sup>1,3,#</sup>, Yihui Jin<sup>1,#</sup>, Yuheng Ma<sup>1</sup>, Yan Zhao<sup>1</sup>, Xin Gao<sup>1</sup>, Yuting Zhao<sup>1</sup>,  
Xiao Qi<sup>1</sup>, Guodong Liang<sup>1,3,\*</sup>, Lu Ga<sup>1,\*</sup>, Gang Li<sup>1,\*</sup>, Jie Yang<sup>2,\*</sup>

*(1. Key Laboratory for Candidate Drug Design and Screening Based on Chemical Biology, College of Pharmacy, Inner Mongolia Medical University, Hohhot, P.R.China; 2. NMPA Key Laboratory for Research and Evaluation of Drug Metabolism, Guangdong Provincial Key Laboratory of New Drug Screening, Guangdong-Hongkong-Macao Joint Laboratory for New Drug Screening, School of Pharmaceutical Sciences, Southern Medical University, Guangzhou P.R.China; 3. Beijing Institute of Pharmacology and Toxicology, Beijing, P.R.China)*

---

\* Address correspondence to these authors at the College of Pharmacy, Inner Mongolia Medical University, Huhhot 010110, P. R. China, E-mail: [lgd08502214@163.com](mailto:lgd08502214@163.com); and NMPA Key Laboratory for Research and Evaluation of Drug Metabolism, Guangdong Provincial Key Laboratory of New Drug Screening, Guangdong-Hongkong-Macao Joint Laboratory for New Drug Screening, School of Pharmaceutical Sciences, Southern Medical University, Guangzhou P.R.China, E-mail: [yj528@smu.edu.cn](mailto:yj528@smu.edu.cn).

# These authors contributed equally to this work.

Content:

1. Spatial schematic of the N-peptides constructed with SWISS MODEL.....3
2. HDock results between N-peptides and target peptide C34 from CHR region of HIV-1 gp41.....8
3. Analytical FT-ICR-MS of N-peptide thioesterified intermediates and N-peptides .....10

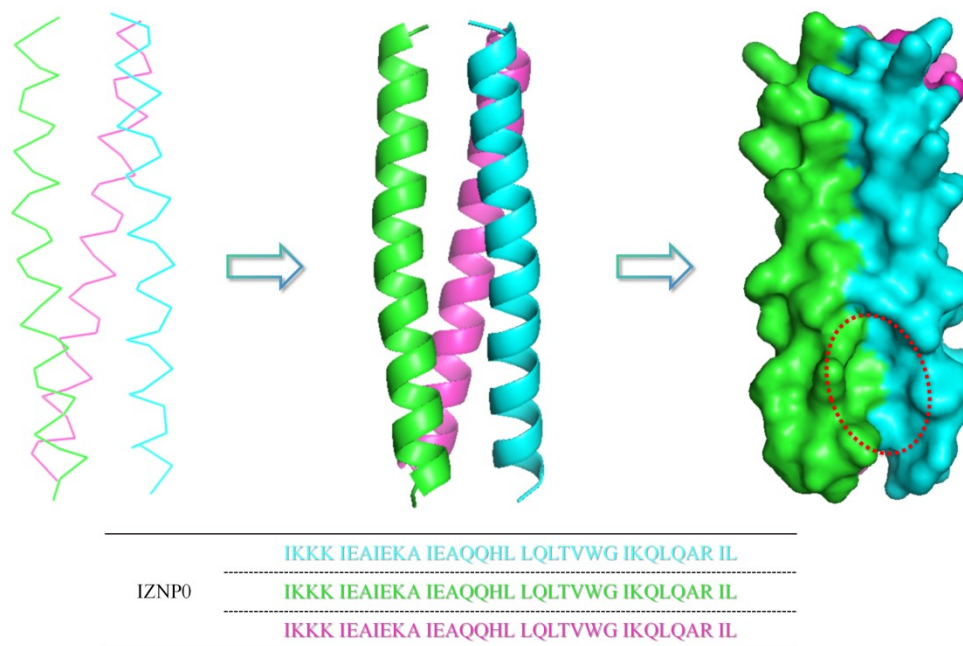

**Figure S1.** The triple helix conformation of IZNP0 is shown in ribbon, cartoon representation and electrostatic surface. The dashed red circle represents the "Pocket domain".

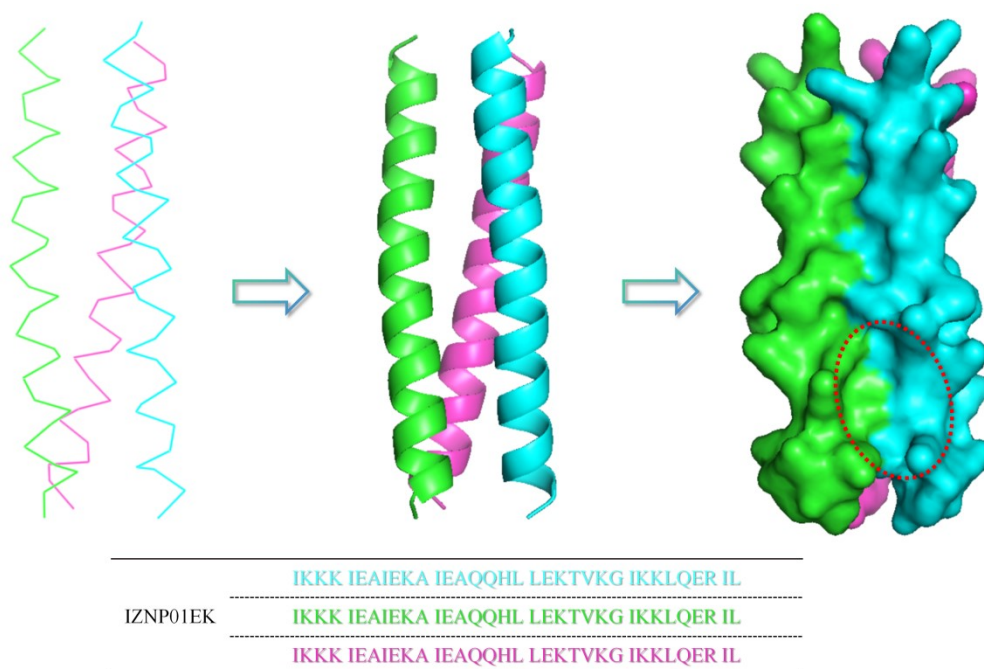

**Figure S2.** The triple helix conformation of IZNP01EK is shown in ribbon, cartoon representation and electrostatic surface. The dashed red circle represents the "Pocket domain".

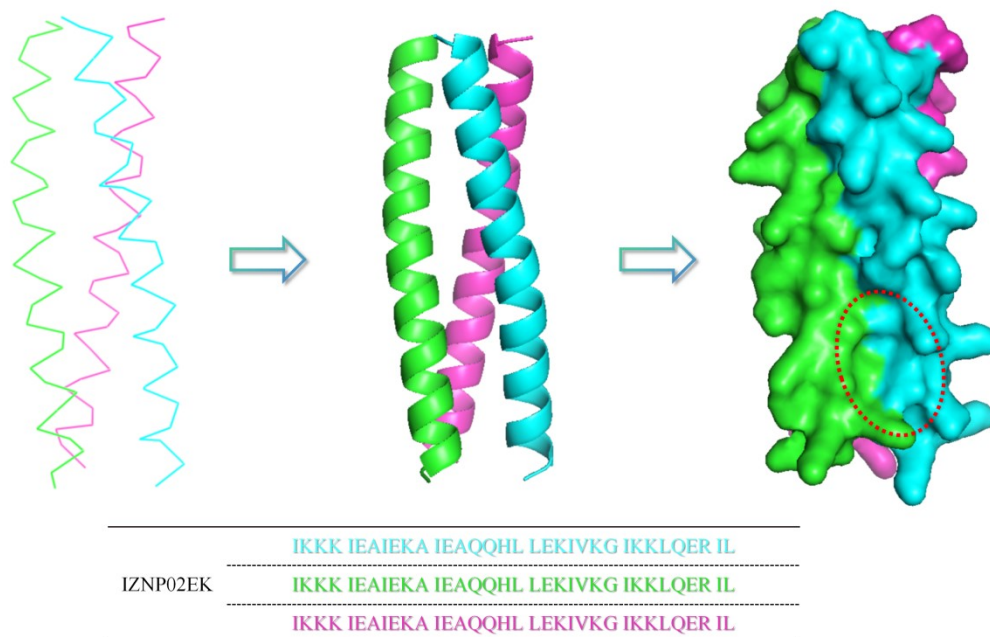

**Figure S3.** The triple helix conformation of IZNP02EK is shown in ribbon, cartoon representation and electrostatic surface. The dashed red circle represents the "Pocket domain".

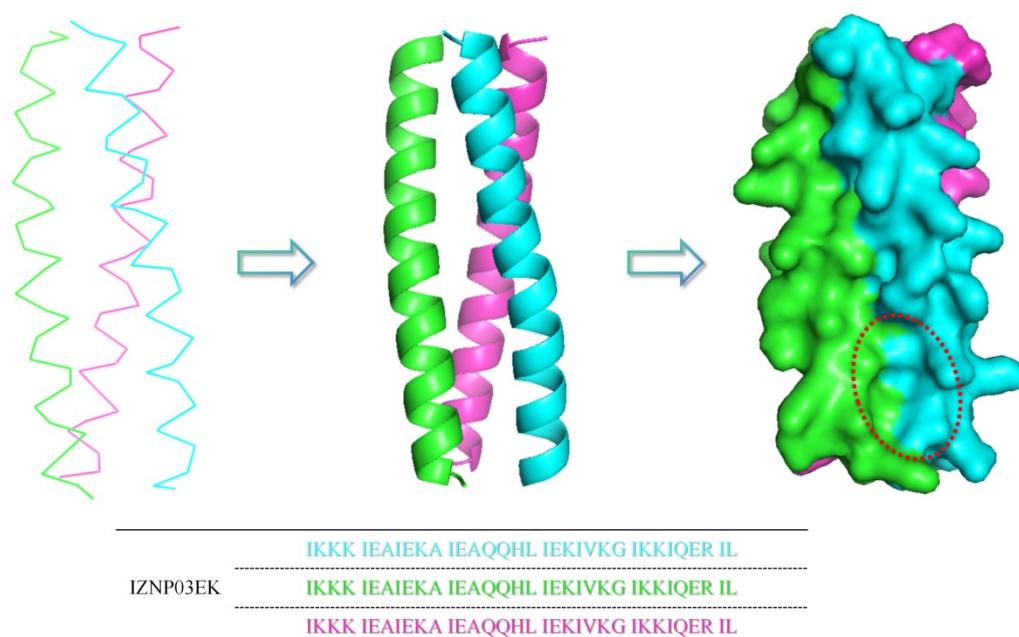

**Figure S4.** The triple helix conformation of IZNP03EK is shown in ribbon, cartoon representation and electrostatic surface. The dashed red circle represents the "Pocket domain".

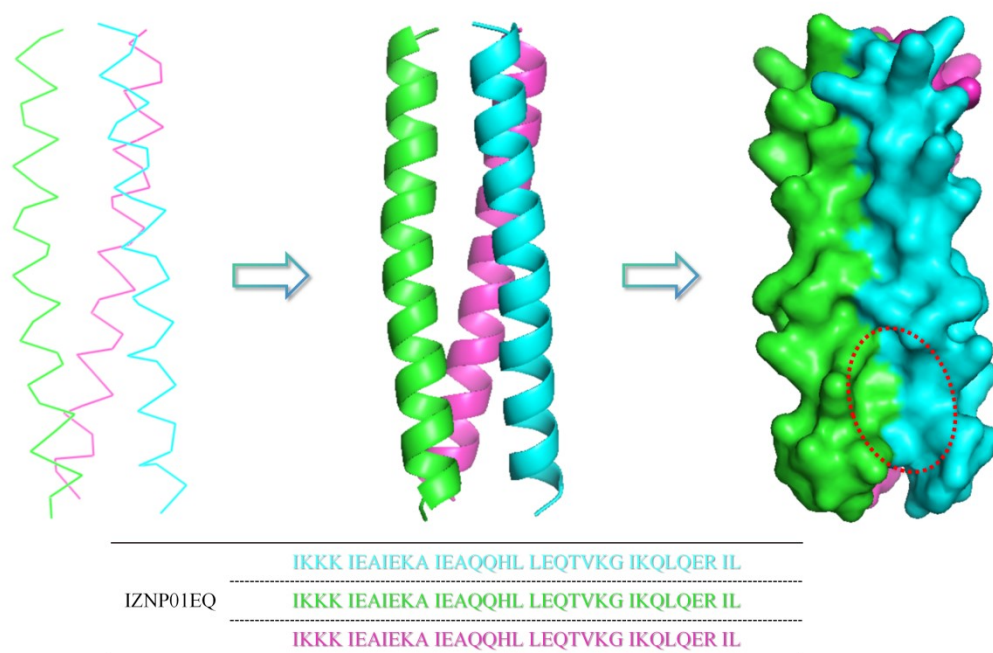

**Figure S5.** The triple helix conformation of IZNP01EQ is shown in ribbon, cartoon representation and electrostatic surface. The dashed red circle represents the "Pocket domain".

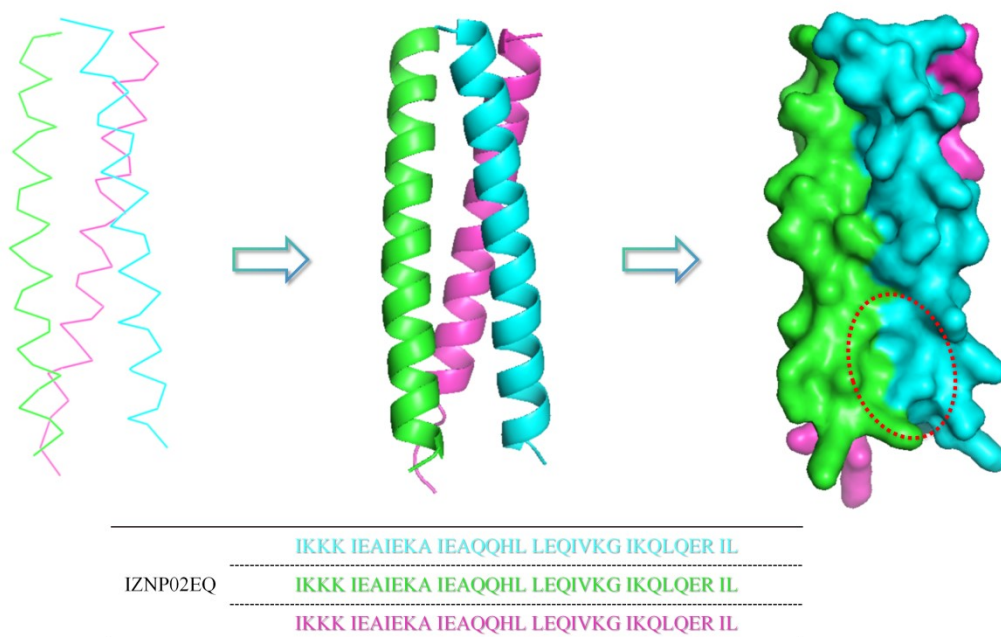

**Figure S6.** The triple helix conformation of IZNP02EQ is shown in ribbon, cartoon representation and electrostatic surface. The dashed red circle represents the "Pocket domain".

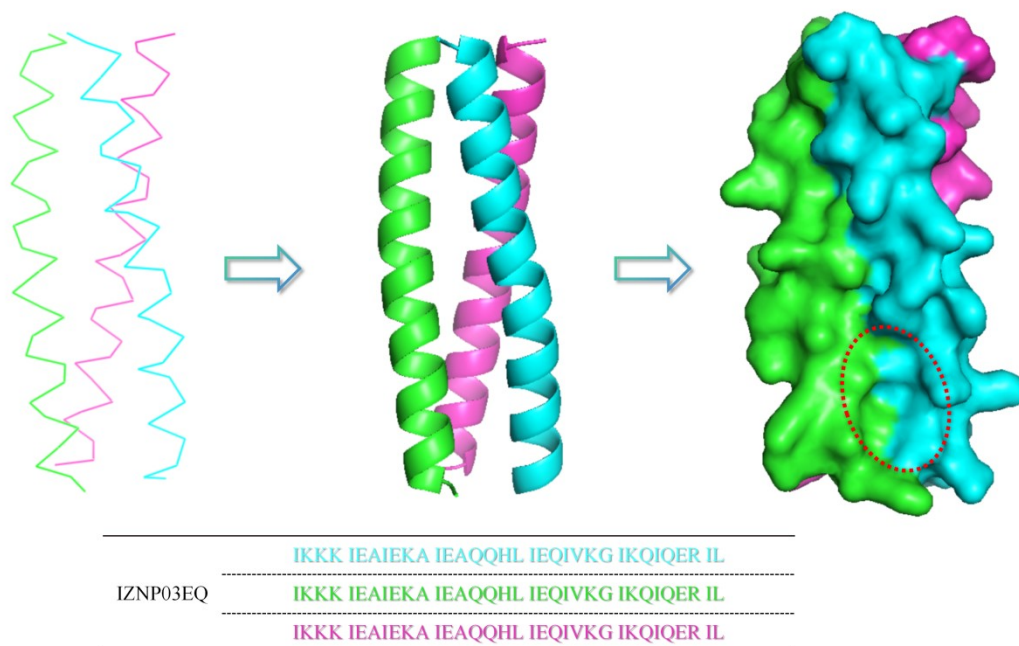

**Figure S7.** The triple helix conformation of IZNP03EQ is shown in ribbon, cartoon representation and electrostatic surface. The dashed red circle represents the "Pocket domain".

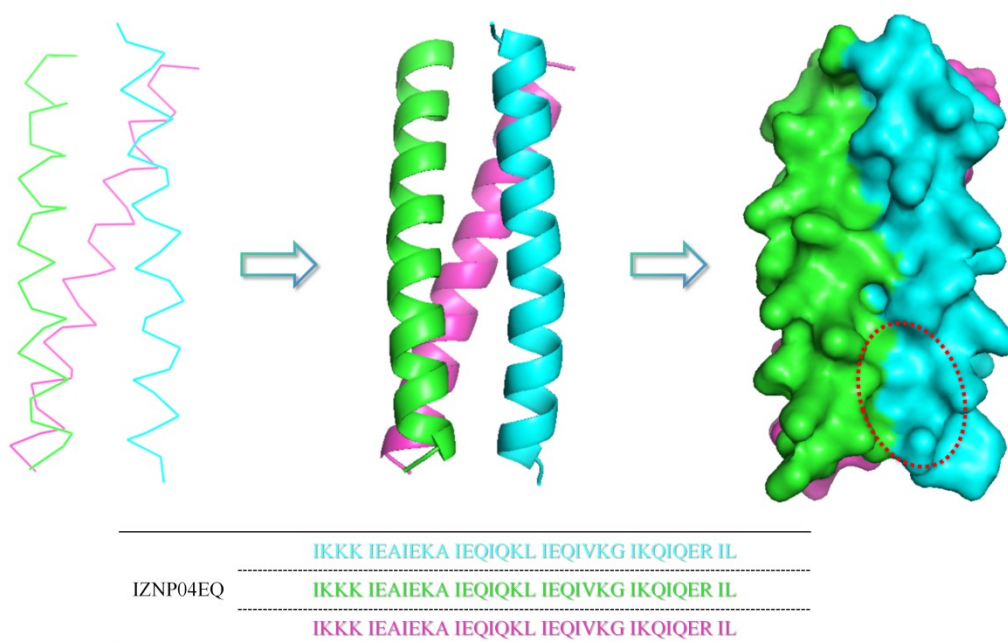

**Figure S8.** The triple helix conformation of IZNP04EQ is shown in ribbon, cartoon representation and electrostatic surface. The dashed red circle represents the "Pocket domain".

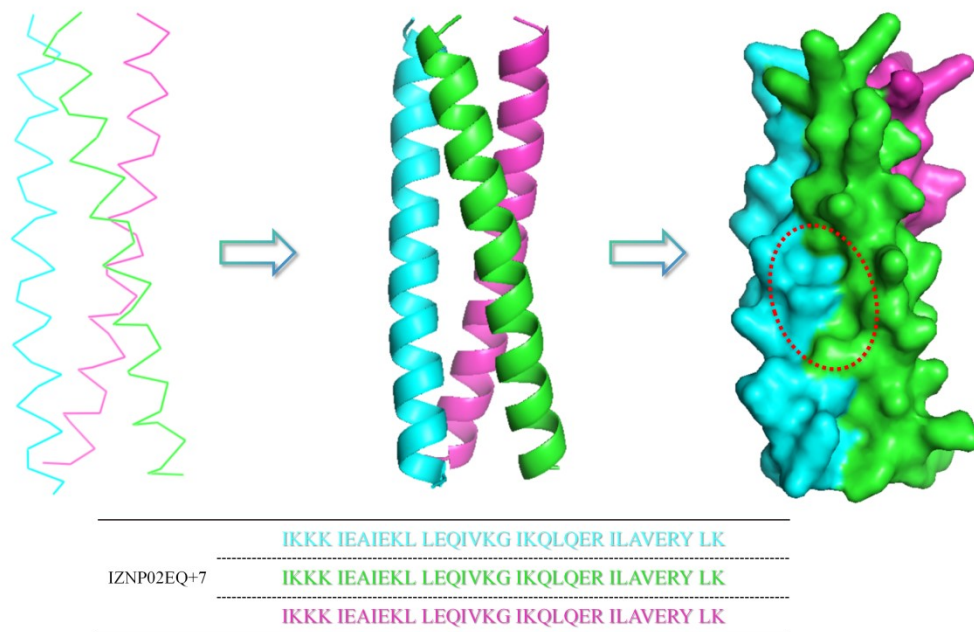

**Figure S9.** The triple helix conformation of IZNP02EQ+7 is shown in ribbon, cartoon representation and electrostatic surface. The dashed red circle represents the "Pocket domain".

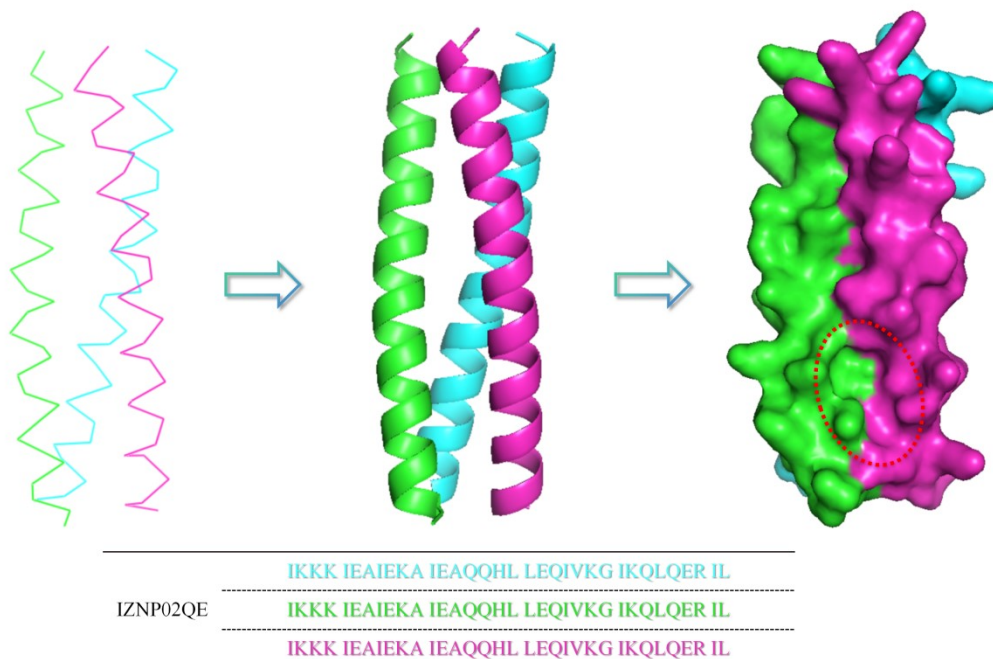

**Figure S10.** The triple helix conformation of IZNP02QE is shown in ribbon, cartoon representation and electrostatic surface. The dashed red circle represents the "Pocket domain".

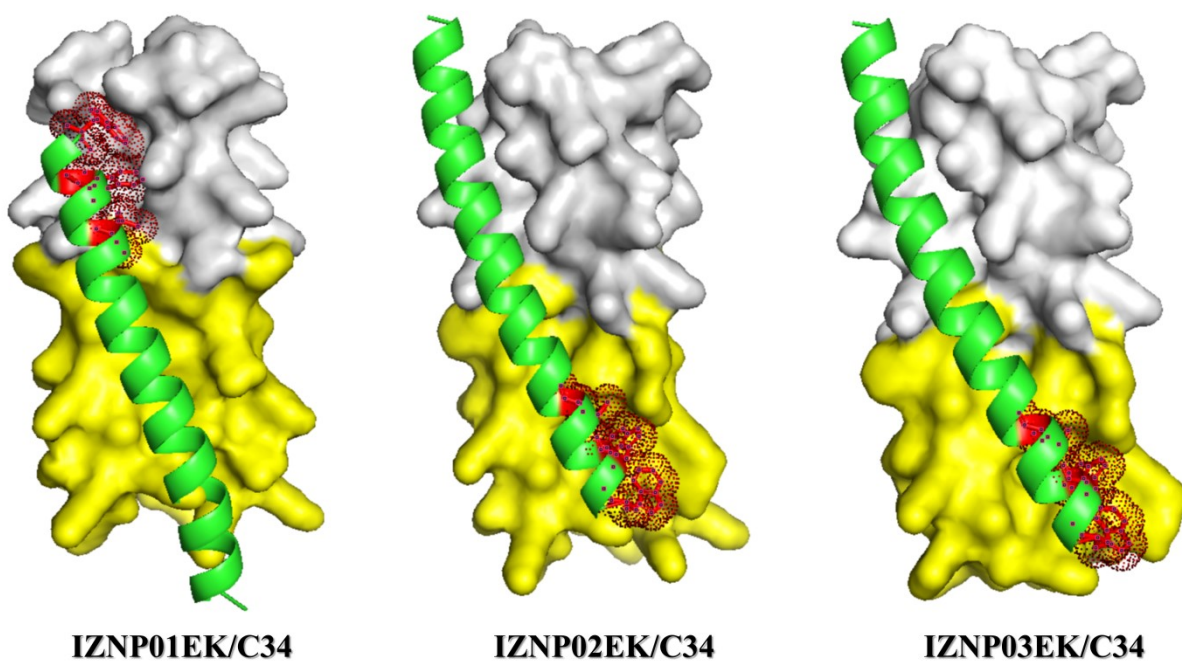

**Figure S11.** The HDOCK-based docking structure of IZNP01EK/C34, IZNP02EK/C34, IZNP03EK/C34 (Grey areas represent the pocket domains similar to NHR region, the green helix is C34 and the red amino acid residues are “WWI modif” for the binding to the pocket domains).

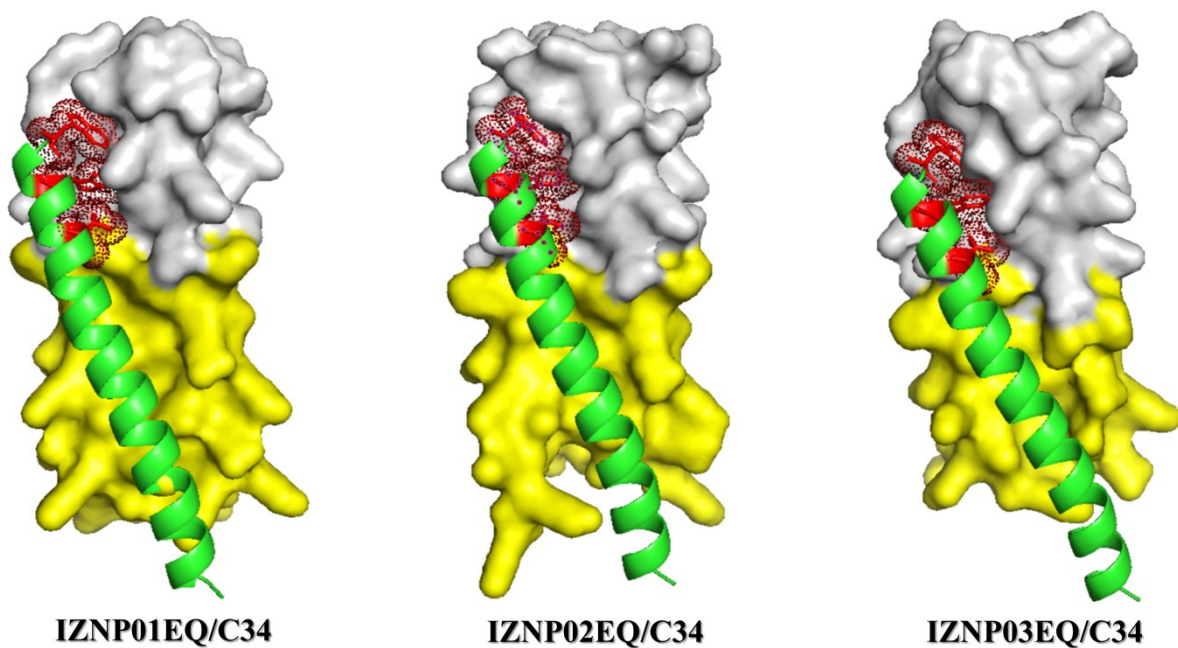

**Figure S12.** The HDOCK-based docking structure of IZNP01EQ/C34, IZNP02EQ/C34, IZNP03EQ/C34 (Grey areas represent the pocket domains similar to NHR region, the green helix is C34 and the red amino acid residues are “WWI modif” for the binding to the pocket domains).



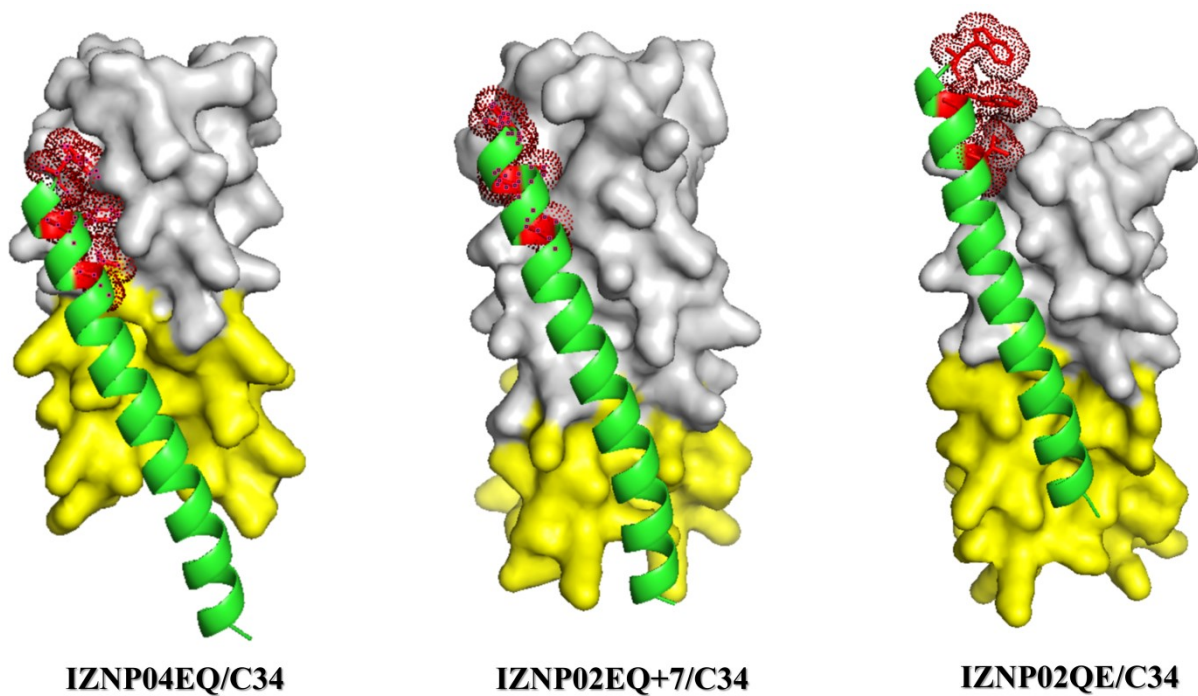

**Figure S13.** The HDock-based docking structure of IZNP04EQ/C34, IZNP02EQ+7/C34, IZNP02QE/C34 (Grey areas represent the pocket domains similar to NHR region, the green helix is C34 and the red amino acid residues are “WWI modif” for the binding to the pocket domains).

Mass Spectrum Molecular Formula Report

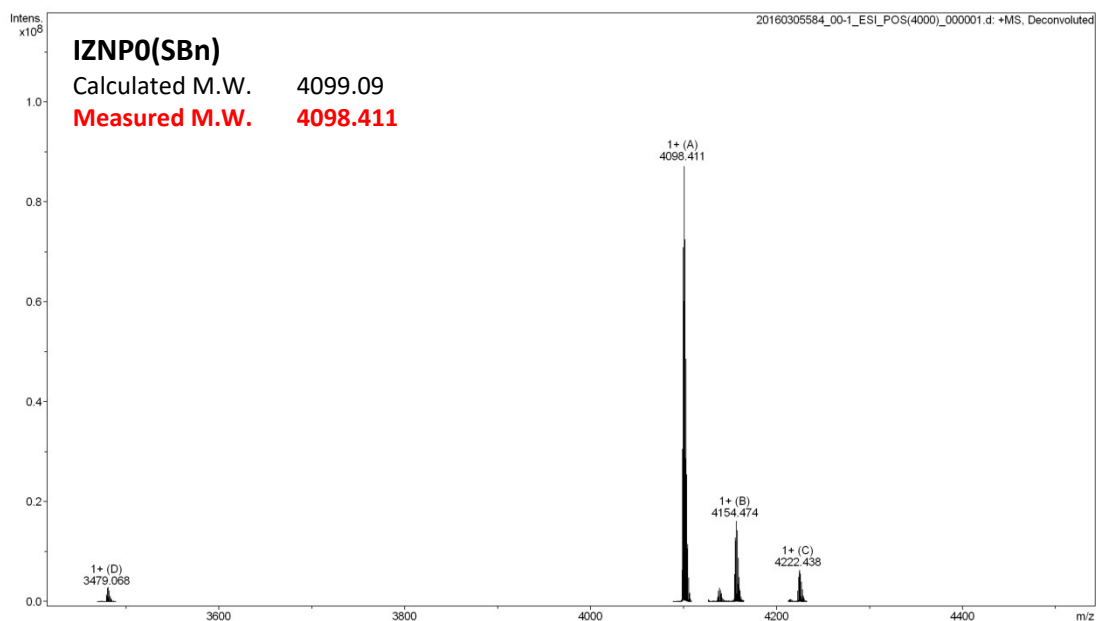

Mass Spectrum Molecular Formula Report

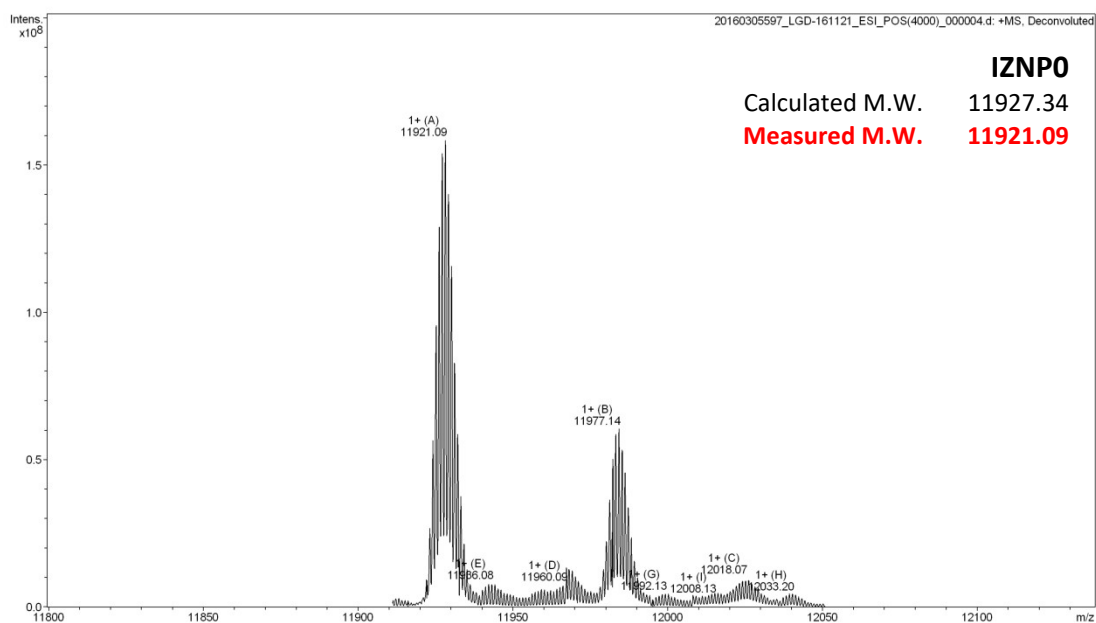

Figure S14 FT-ICR-MS spectrogram of IZNP0 thioesterified intermediate and IZNP0.

### Mass Spectrum Molecular Formula Report

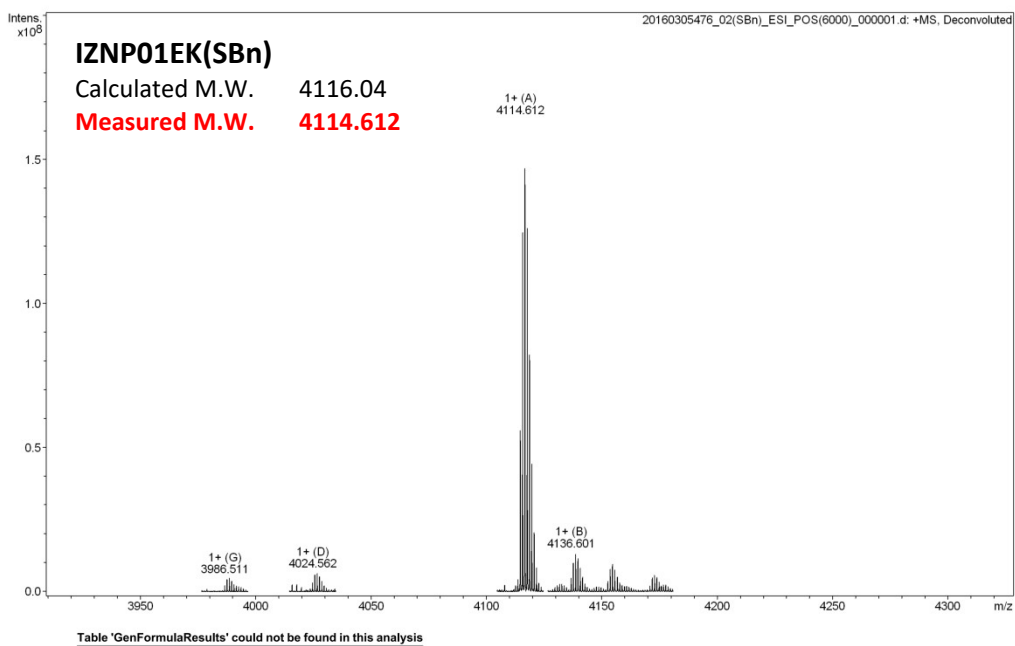

### Mass Spectrum Molecular Formula Report

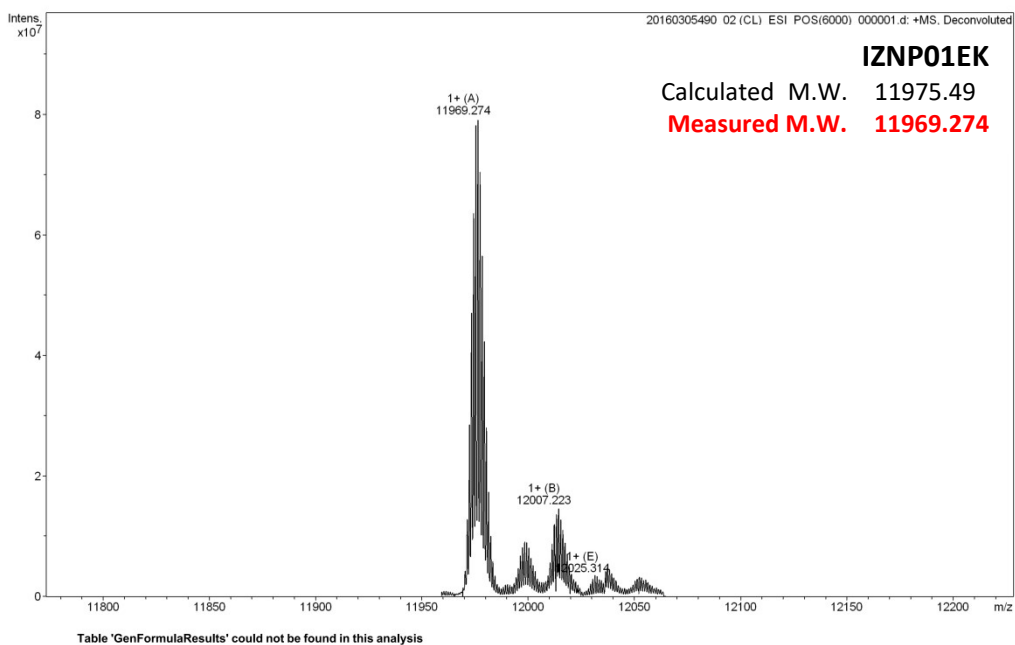

Figure S15 FT-ICR-MS spectrogram of IZNP01EK thioesterified intermediate and IZNP01EK.

### Mass Spectrum Molecular Formula Report

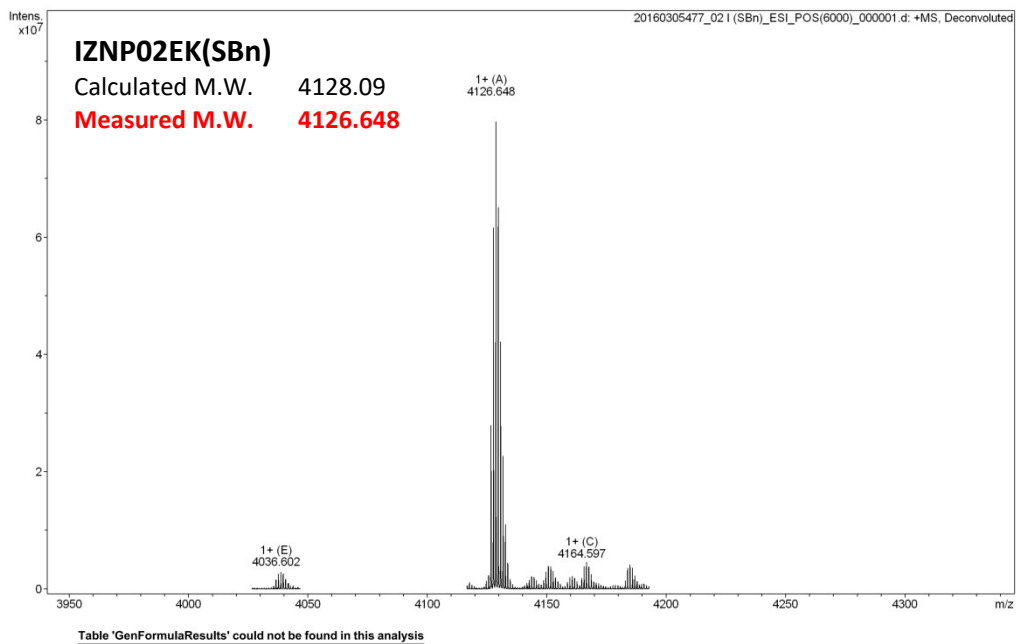

### Mass Spectrum Molecular Formula Report

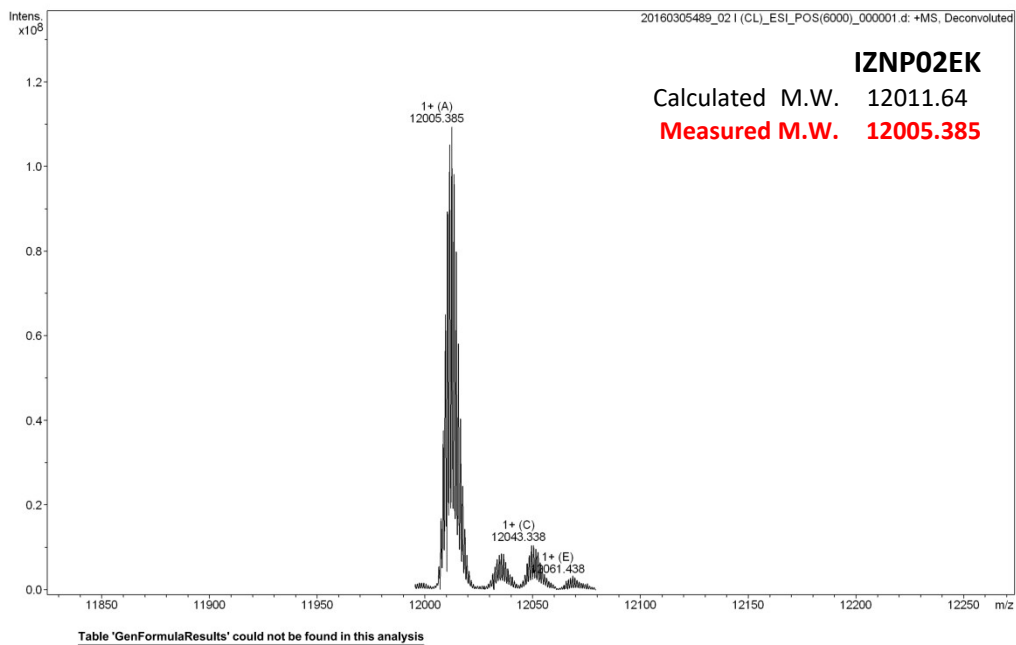

Figure S16 FT-ICR-MS spectrogram of IZNP02EK thioesterified intermediate and IZNP02EK.

### Mass Spectrum Molecular Formula Report

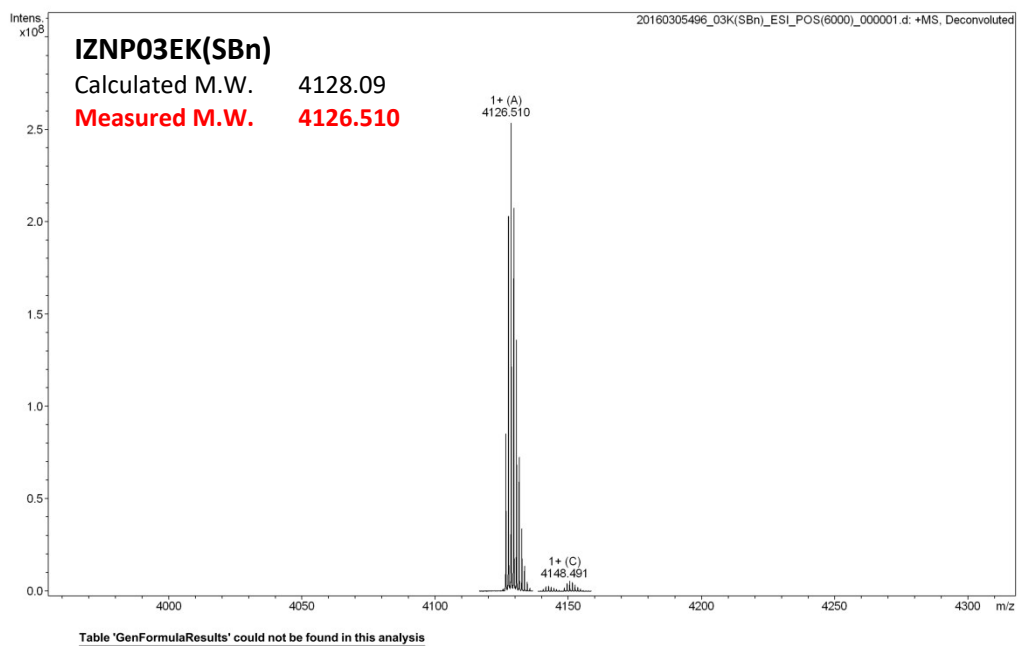

### Mass Spectrum Molecular Formula Report

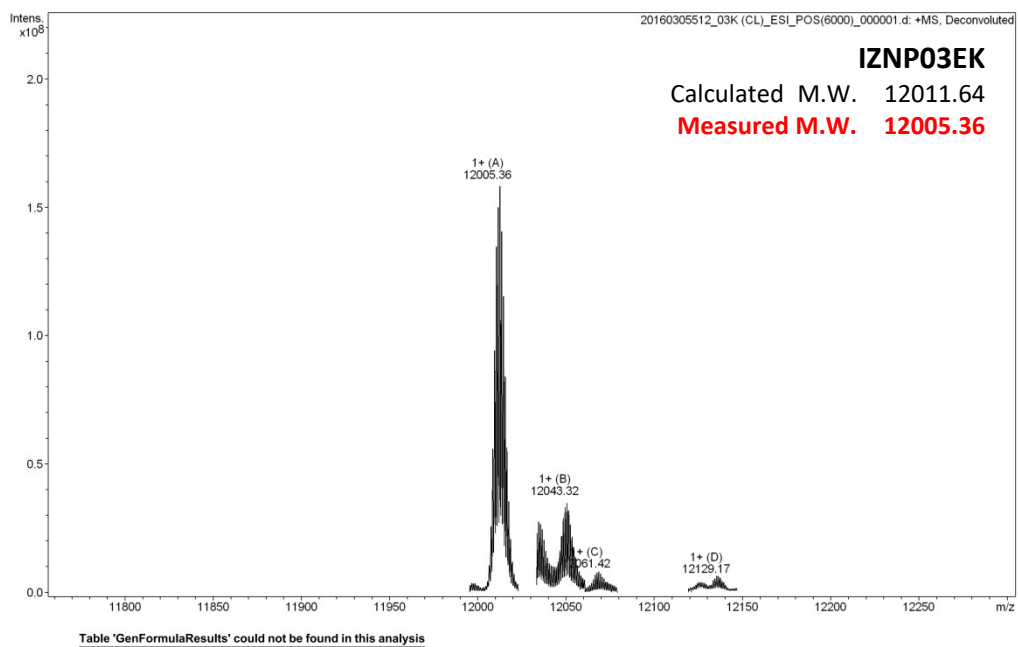

**Figure S17** FT-ICR-MS spectrogram of IZNP03EK thioesterified intermediate and IZNP03EK.

### Mass Spectrum Molecular Formula Report

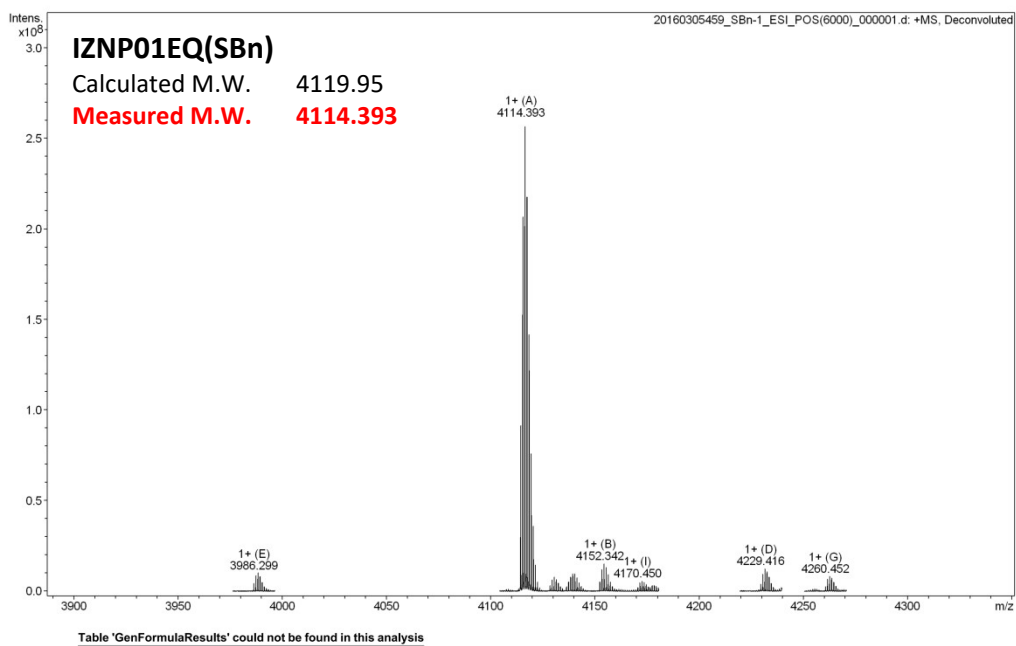

### Mass Spectrum Molecular Formula Report

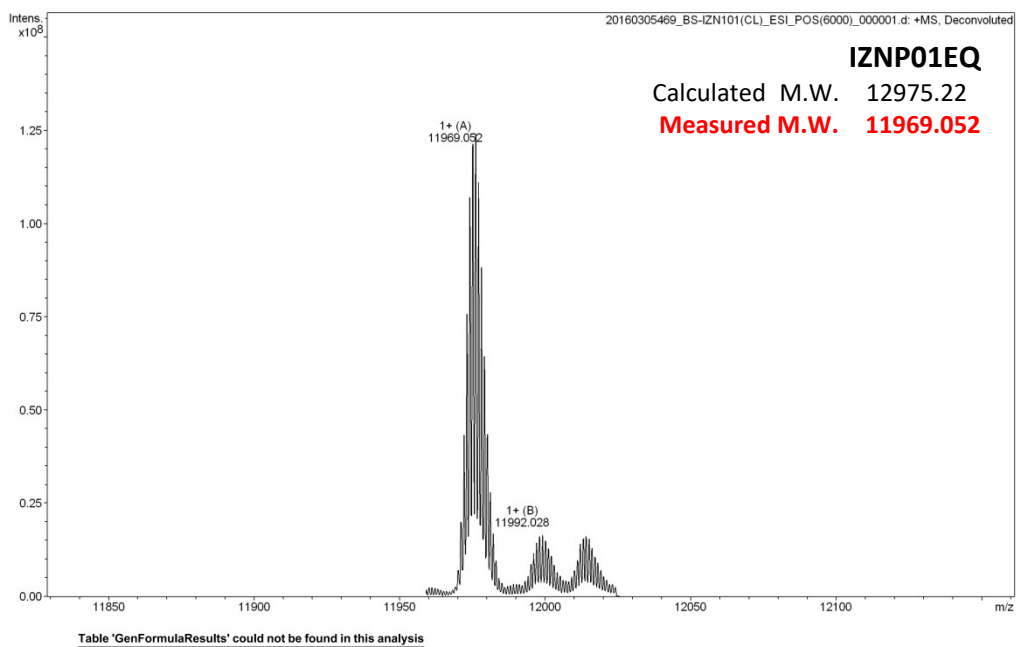

**Figure S18** FT-ICR-MS spectrogram of IZNP01EQ thioesterified intermediate and IZNP01EQ.

### Mass Spectrum Molecular Formula Report

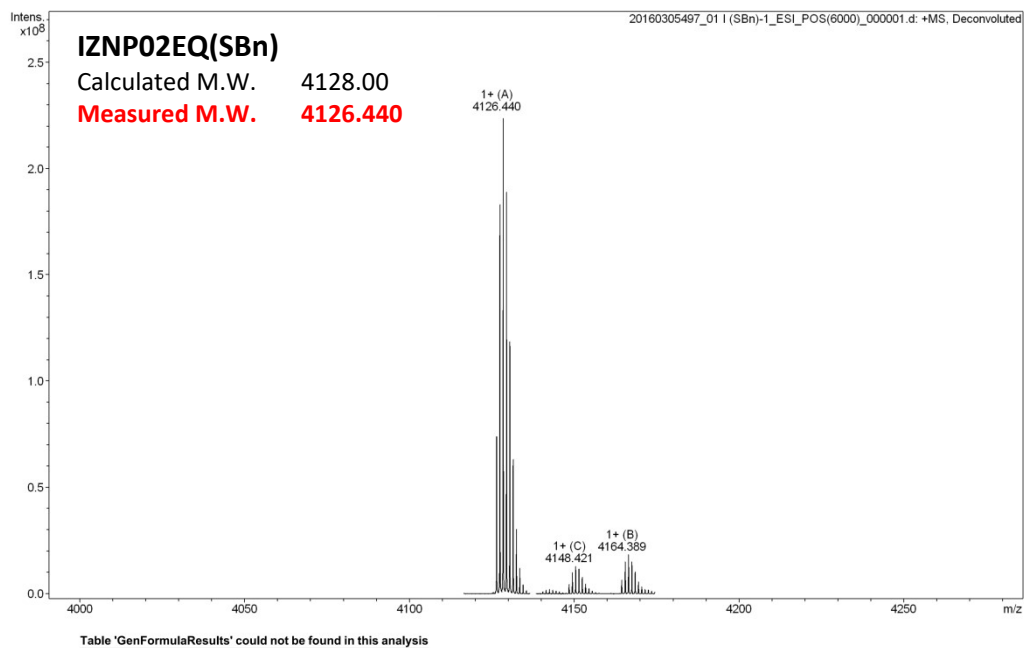

### Mass Spectrum Molecular Formula Report

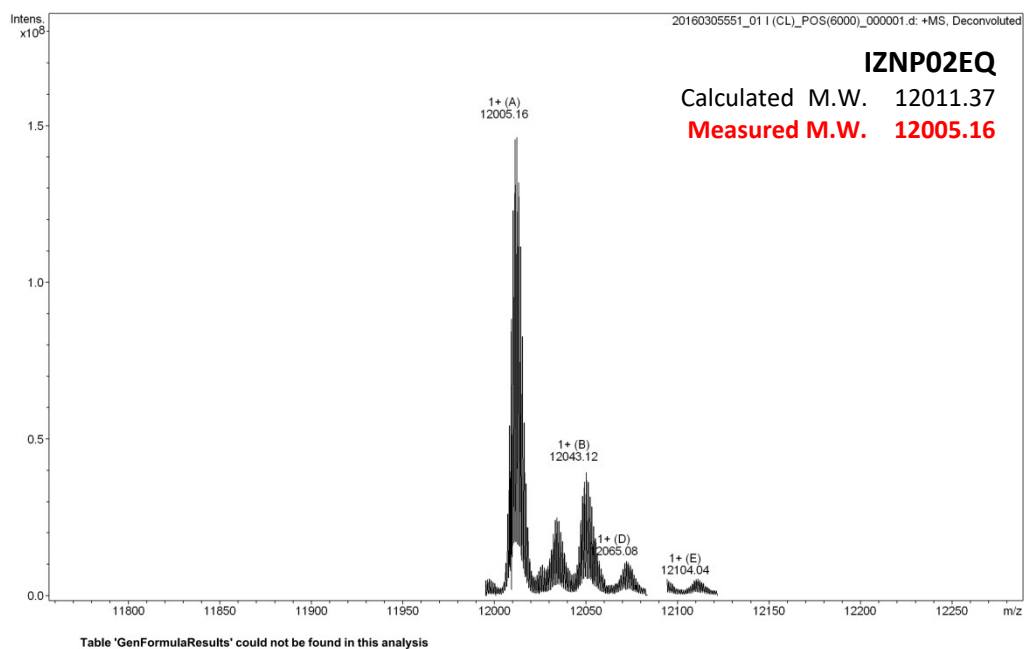

**Figure S19** FT-ICR-MS spectrogram of IZNP02EQ thioesterified intermediate and IZNP02EQ.

Mass Spectrum Molecular Formula Report

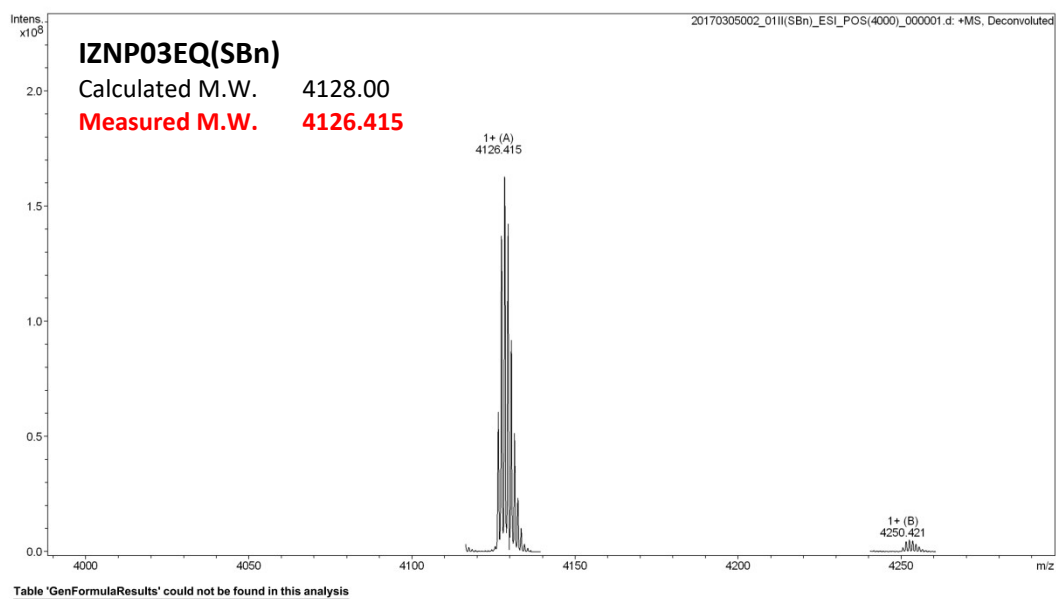

Mass Spectrum Molecular Formula Report

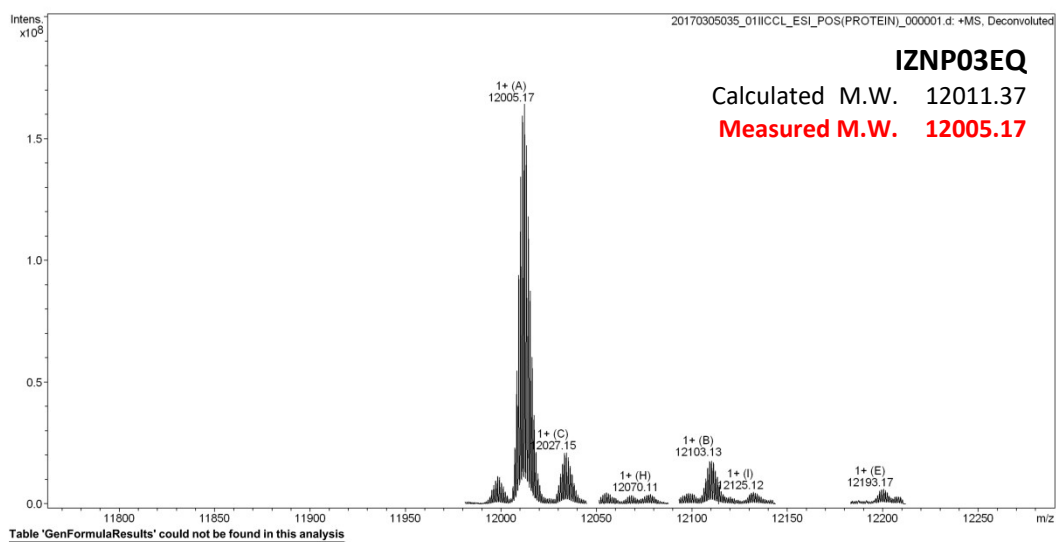

Figure S20 FT-ICR-MS spectrogram of IZNP03EQ thioesterified intermediate and IZNP03EQ.



Mass Spectrum Molecular Formula Report

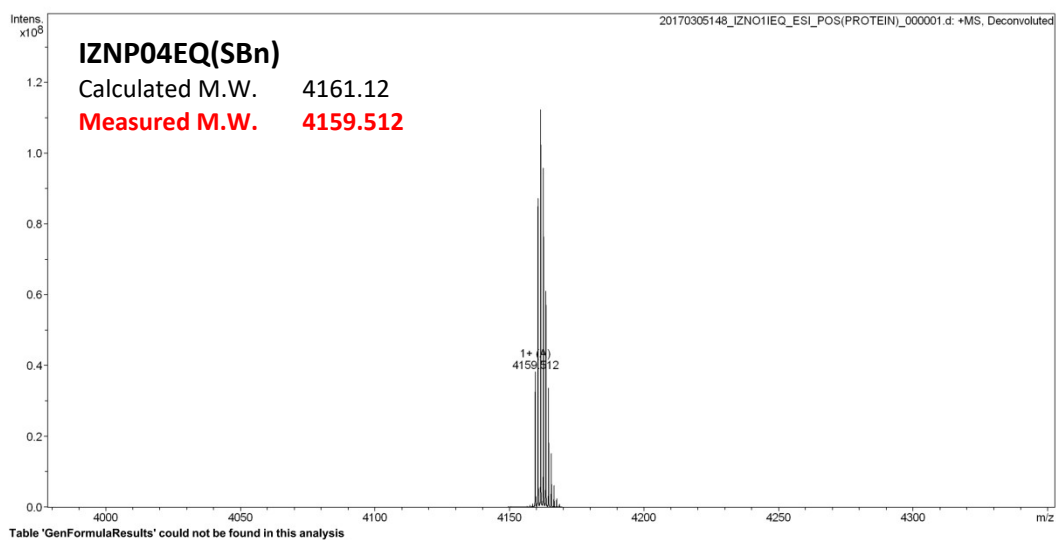

Figure S21 FT-ICR-MS spectrogram of IZNP04EQ thioesterified intermediate.

Mass Spectrum Molecular Formula Report

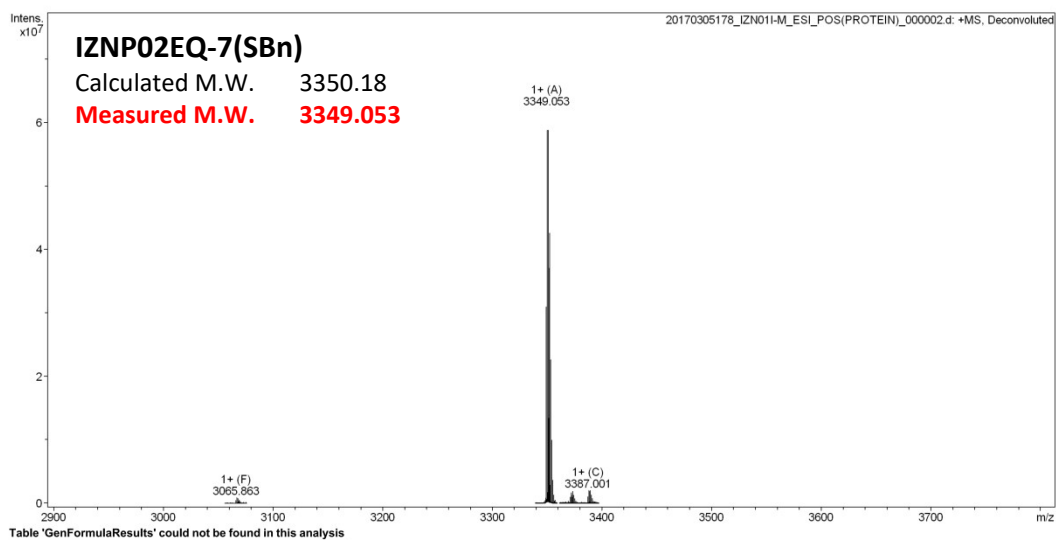

Figure S22 FT-ICR-MS spectrogram of IZNP02EQ-7 thioesterified intermediate.

Mass Spectrum Molecular Formula Report

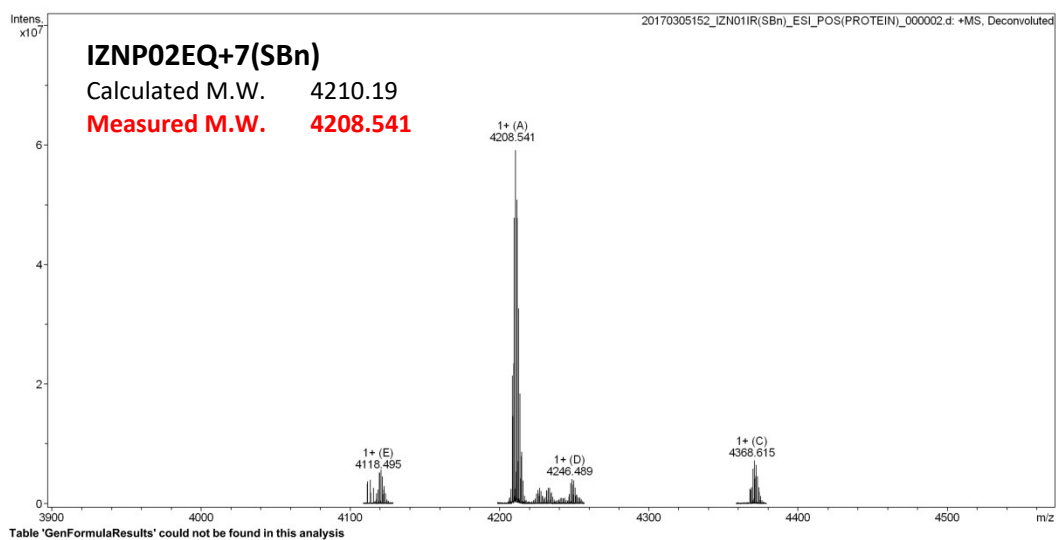

Mass Spectrum Molecular Formula Report

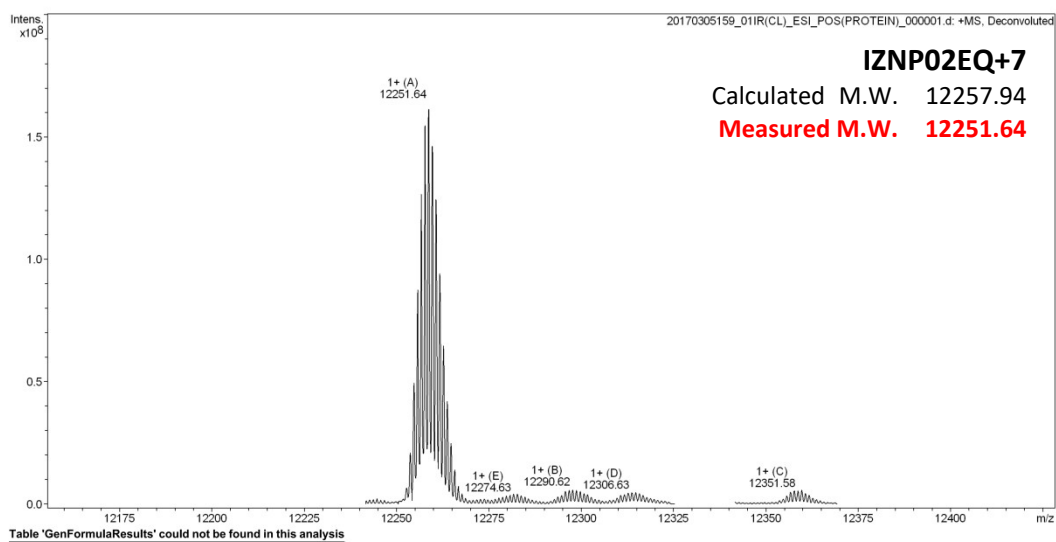

Figure S23 FT-ICR-MS spectrogram of IZNP02EQ+7 thioesterified intermediate and IZNP02EQ+7.

### Mass Spectrum Molecular Formula Report

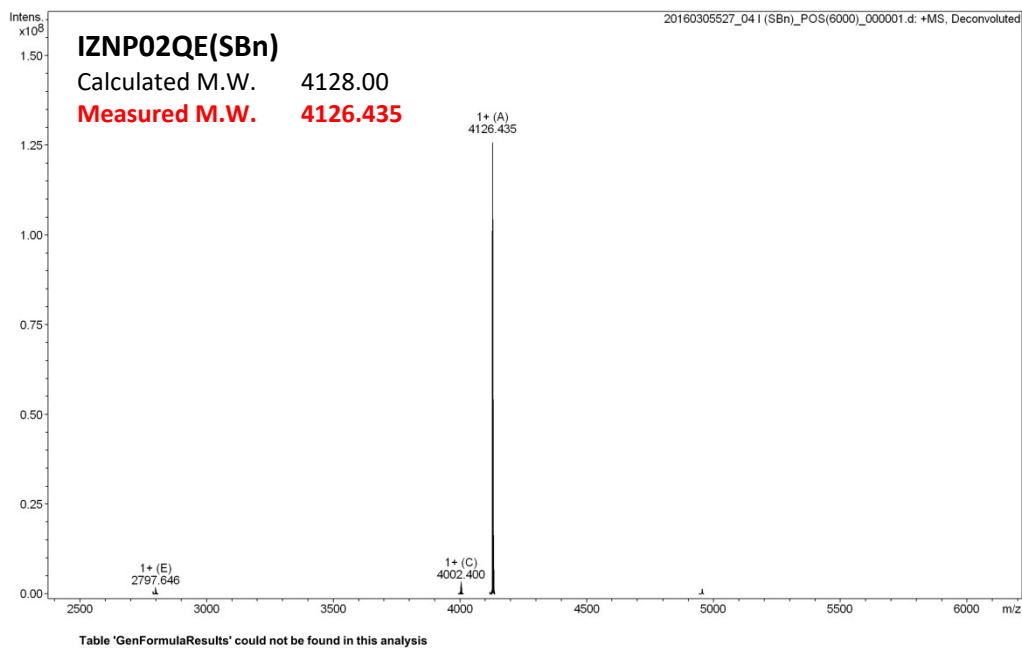

### Mass Spectrum Molecular Formula Report

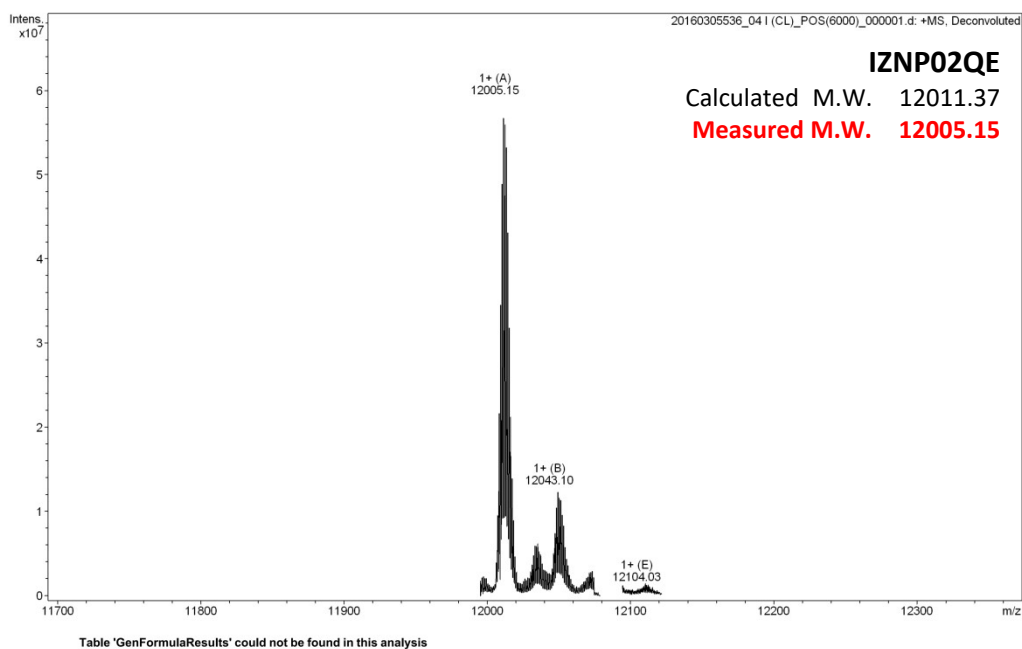

Figure S24 FT-ICR-MS spectrogram of IZNP02EQ+7 thioesterified intermediate and IZNP02EQ+7.
