# Supplementary figures and images for: Design of coiled-coil N-peptides against HIV-1 based on a CADD strategy
Source: Royal Society of Chemistry journal article supplement (doi:10.1039/d4ob01620c), 2024-10-31

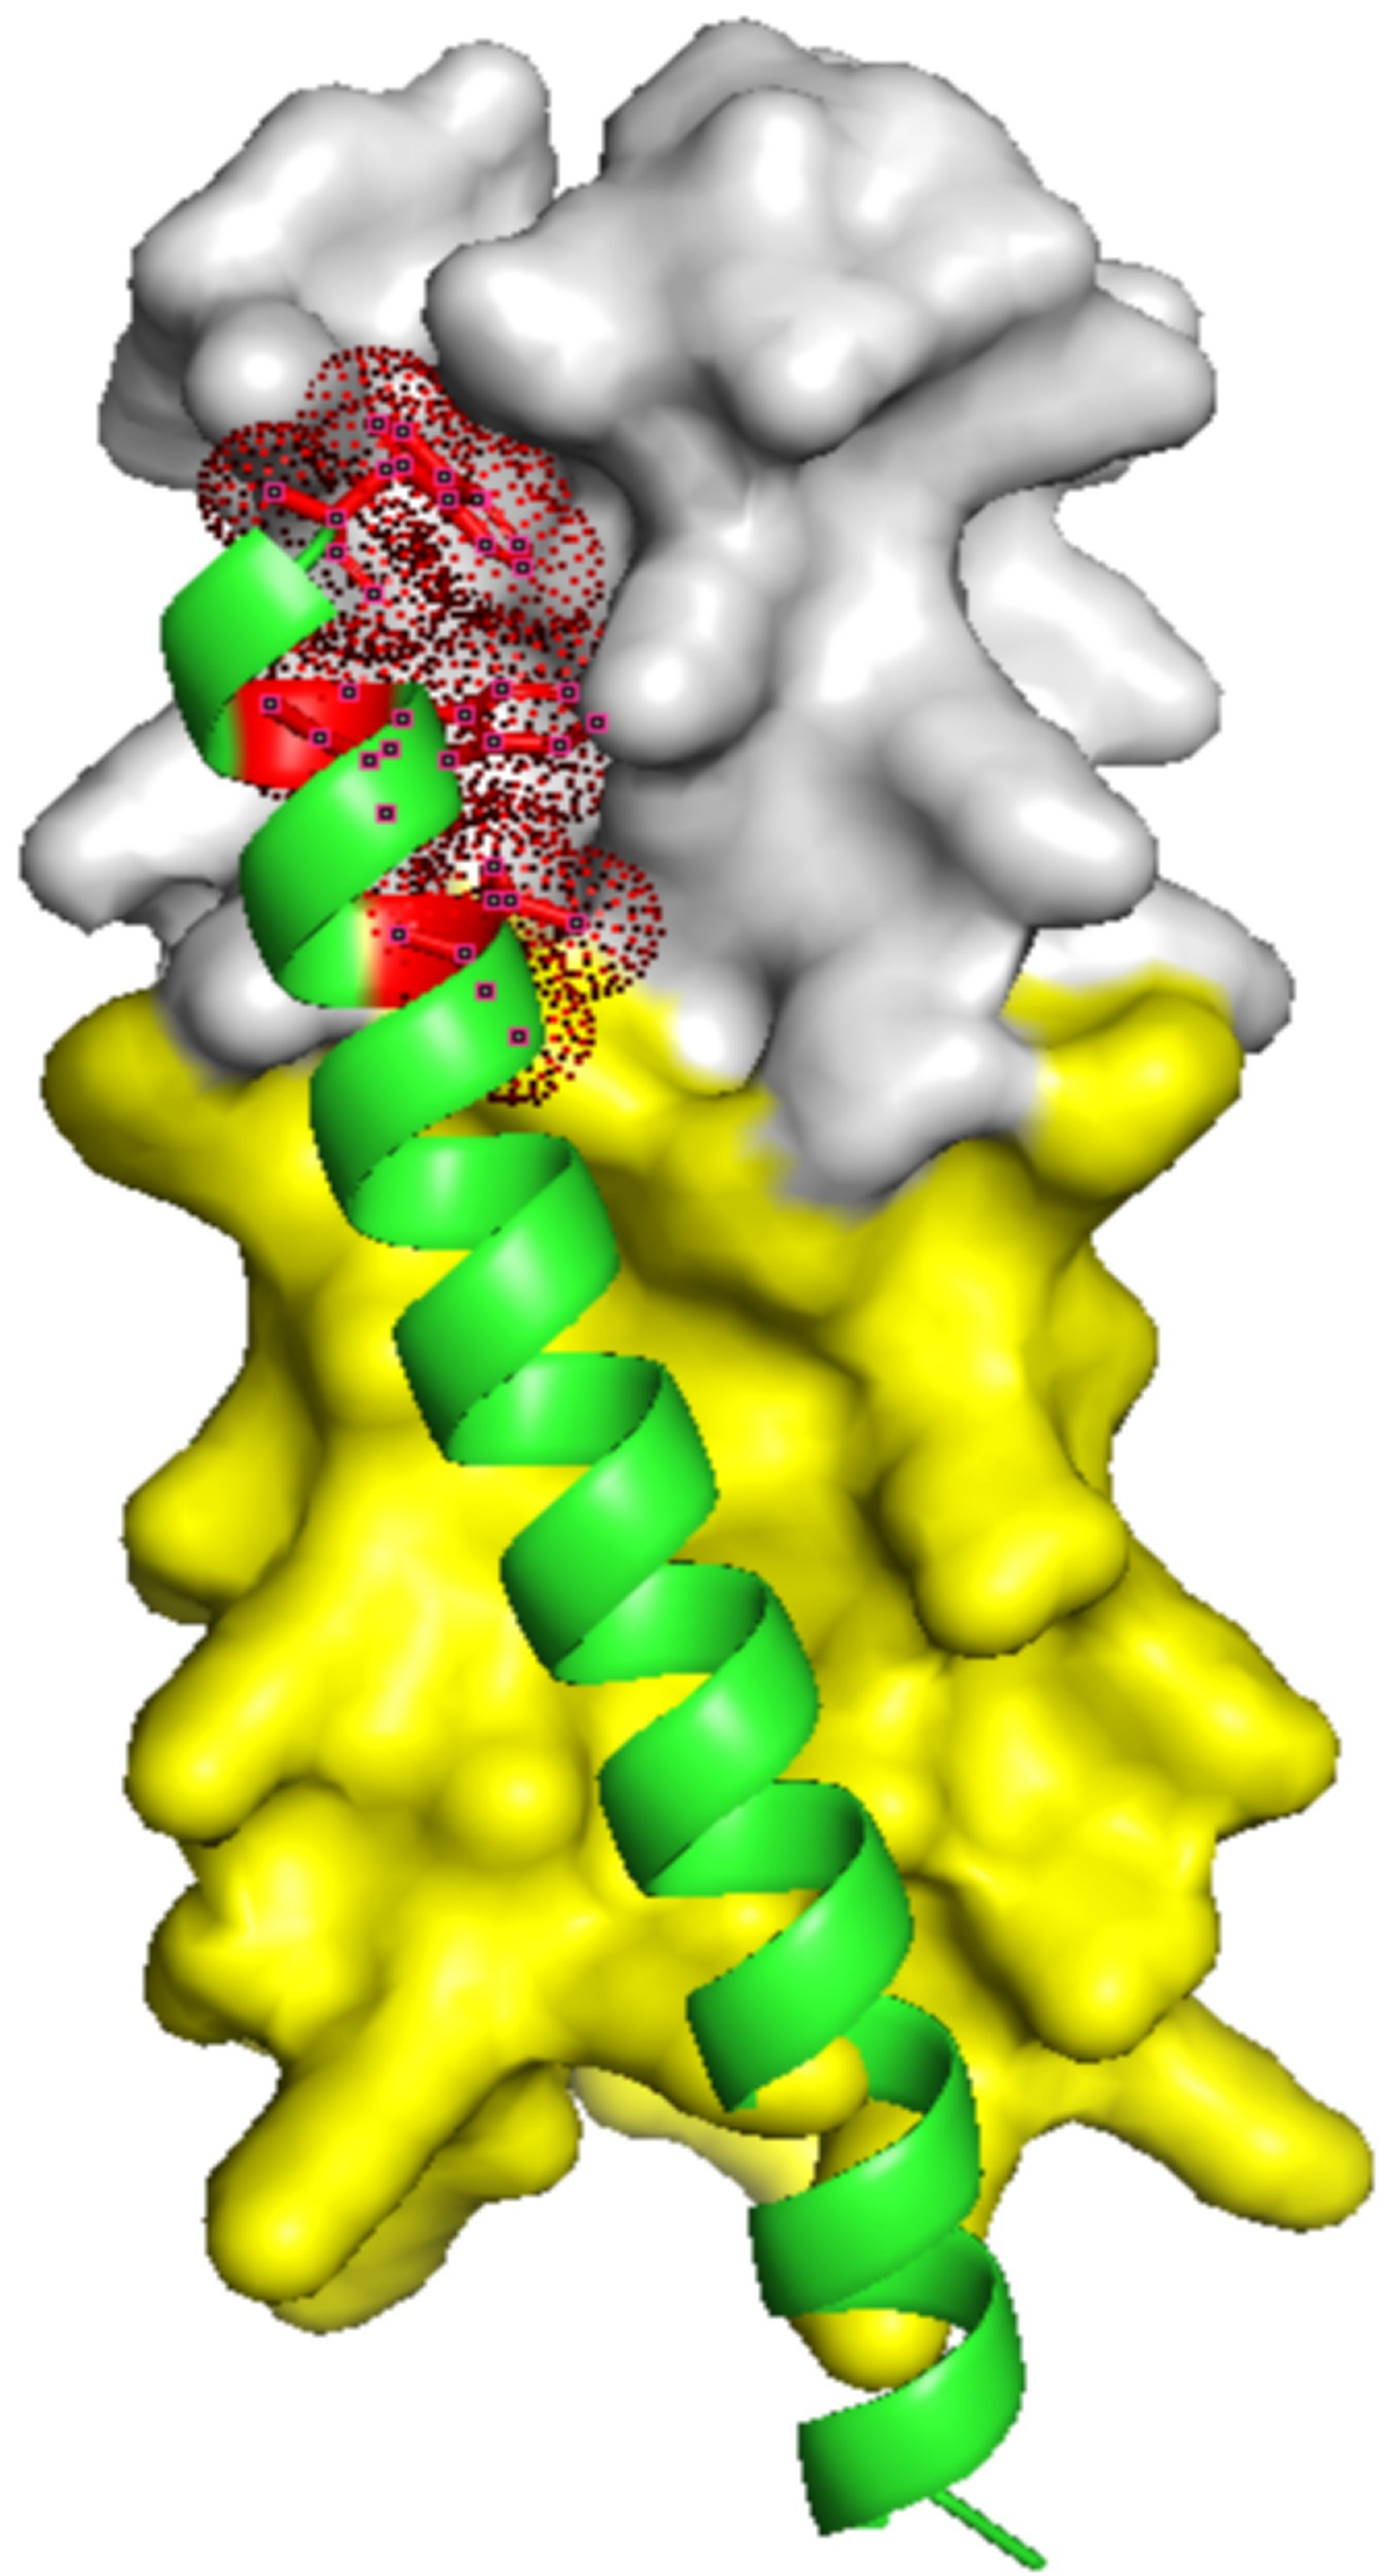

**IZNP01EK/C34**

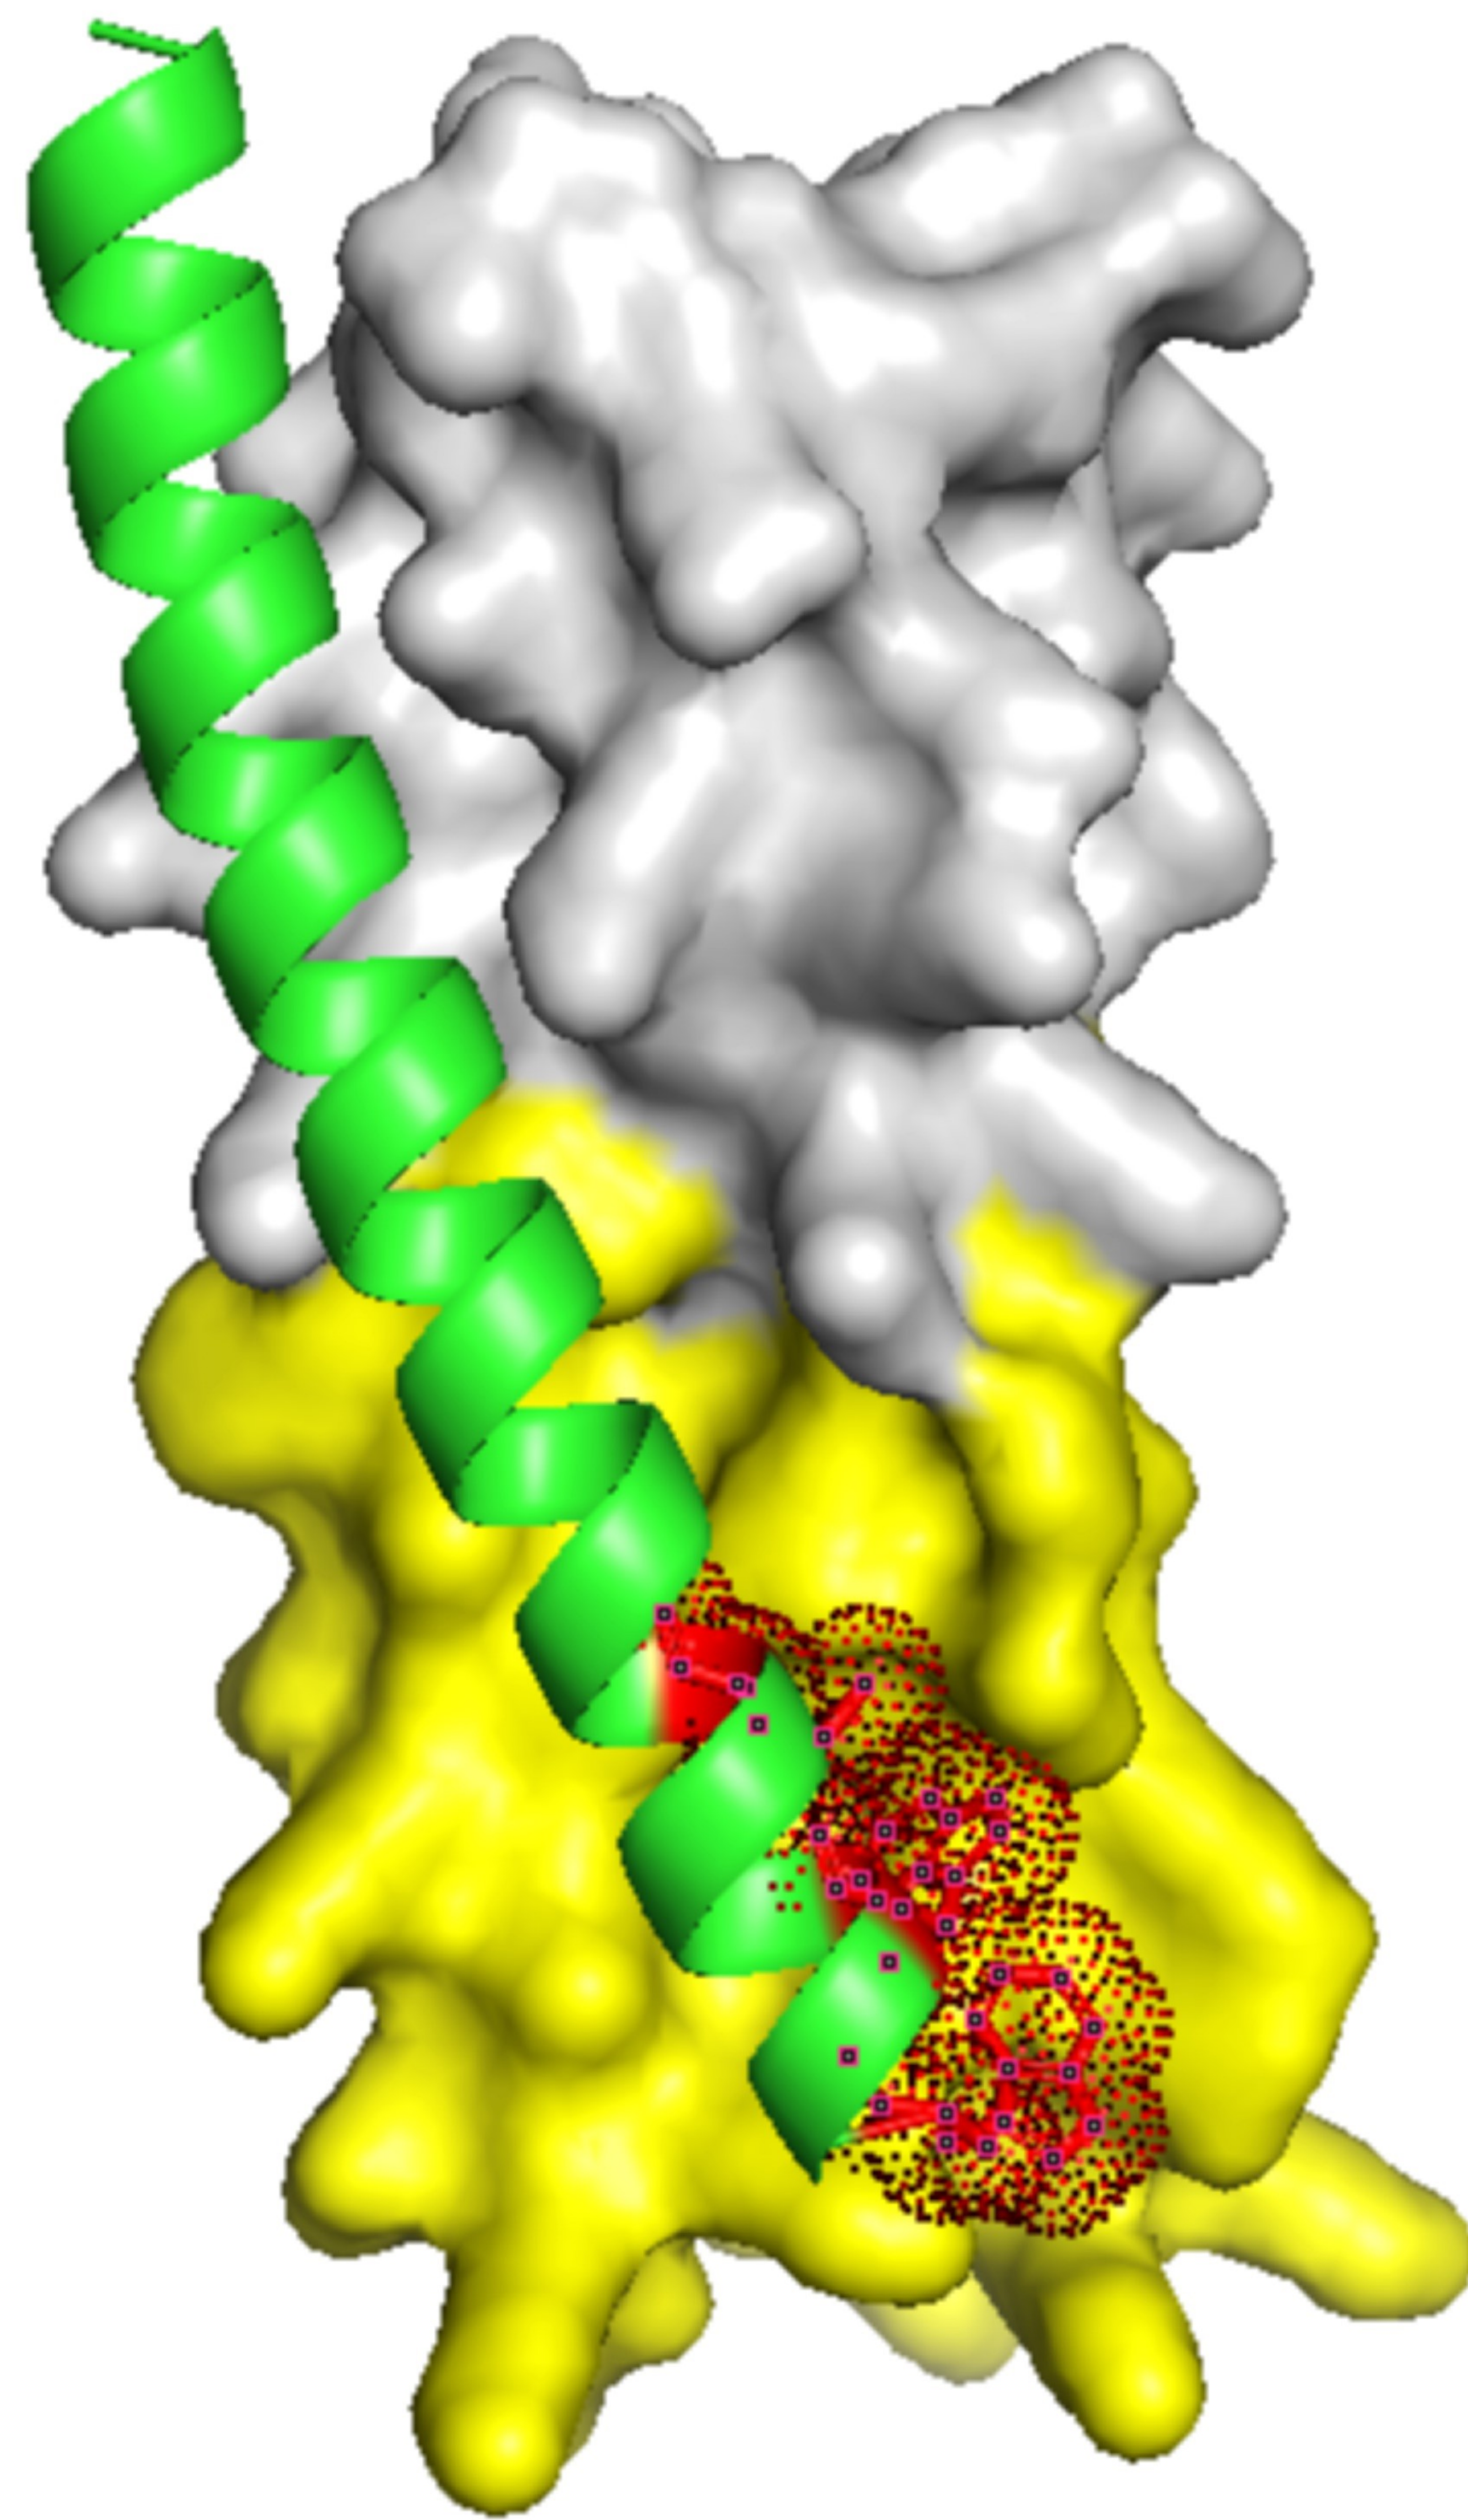

**IZNP02EK/C34**

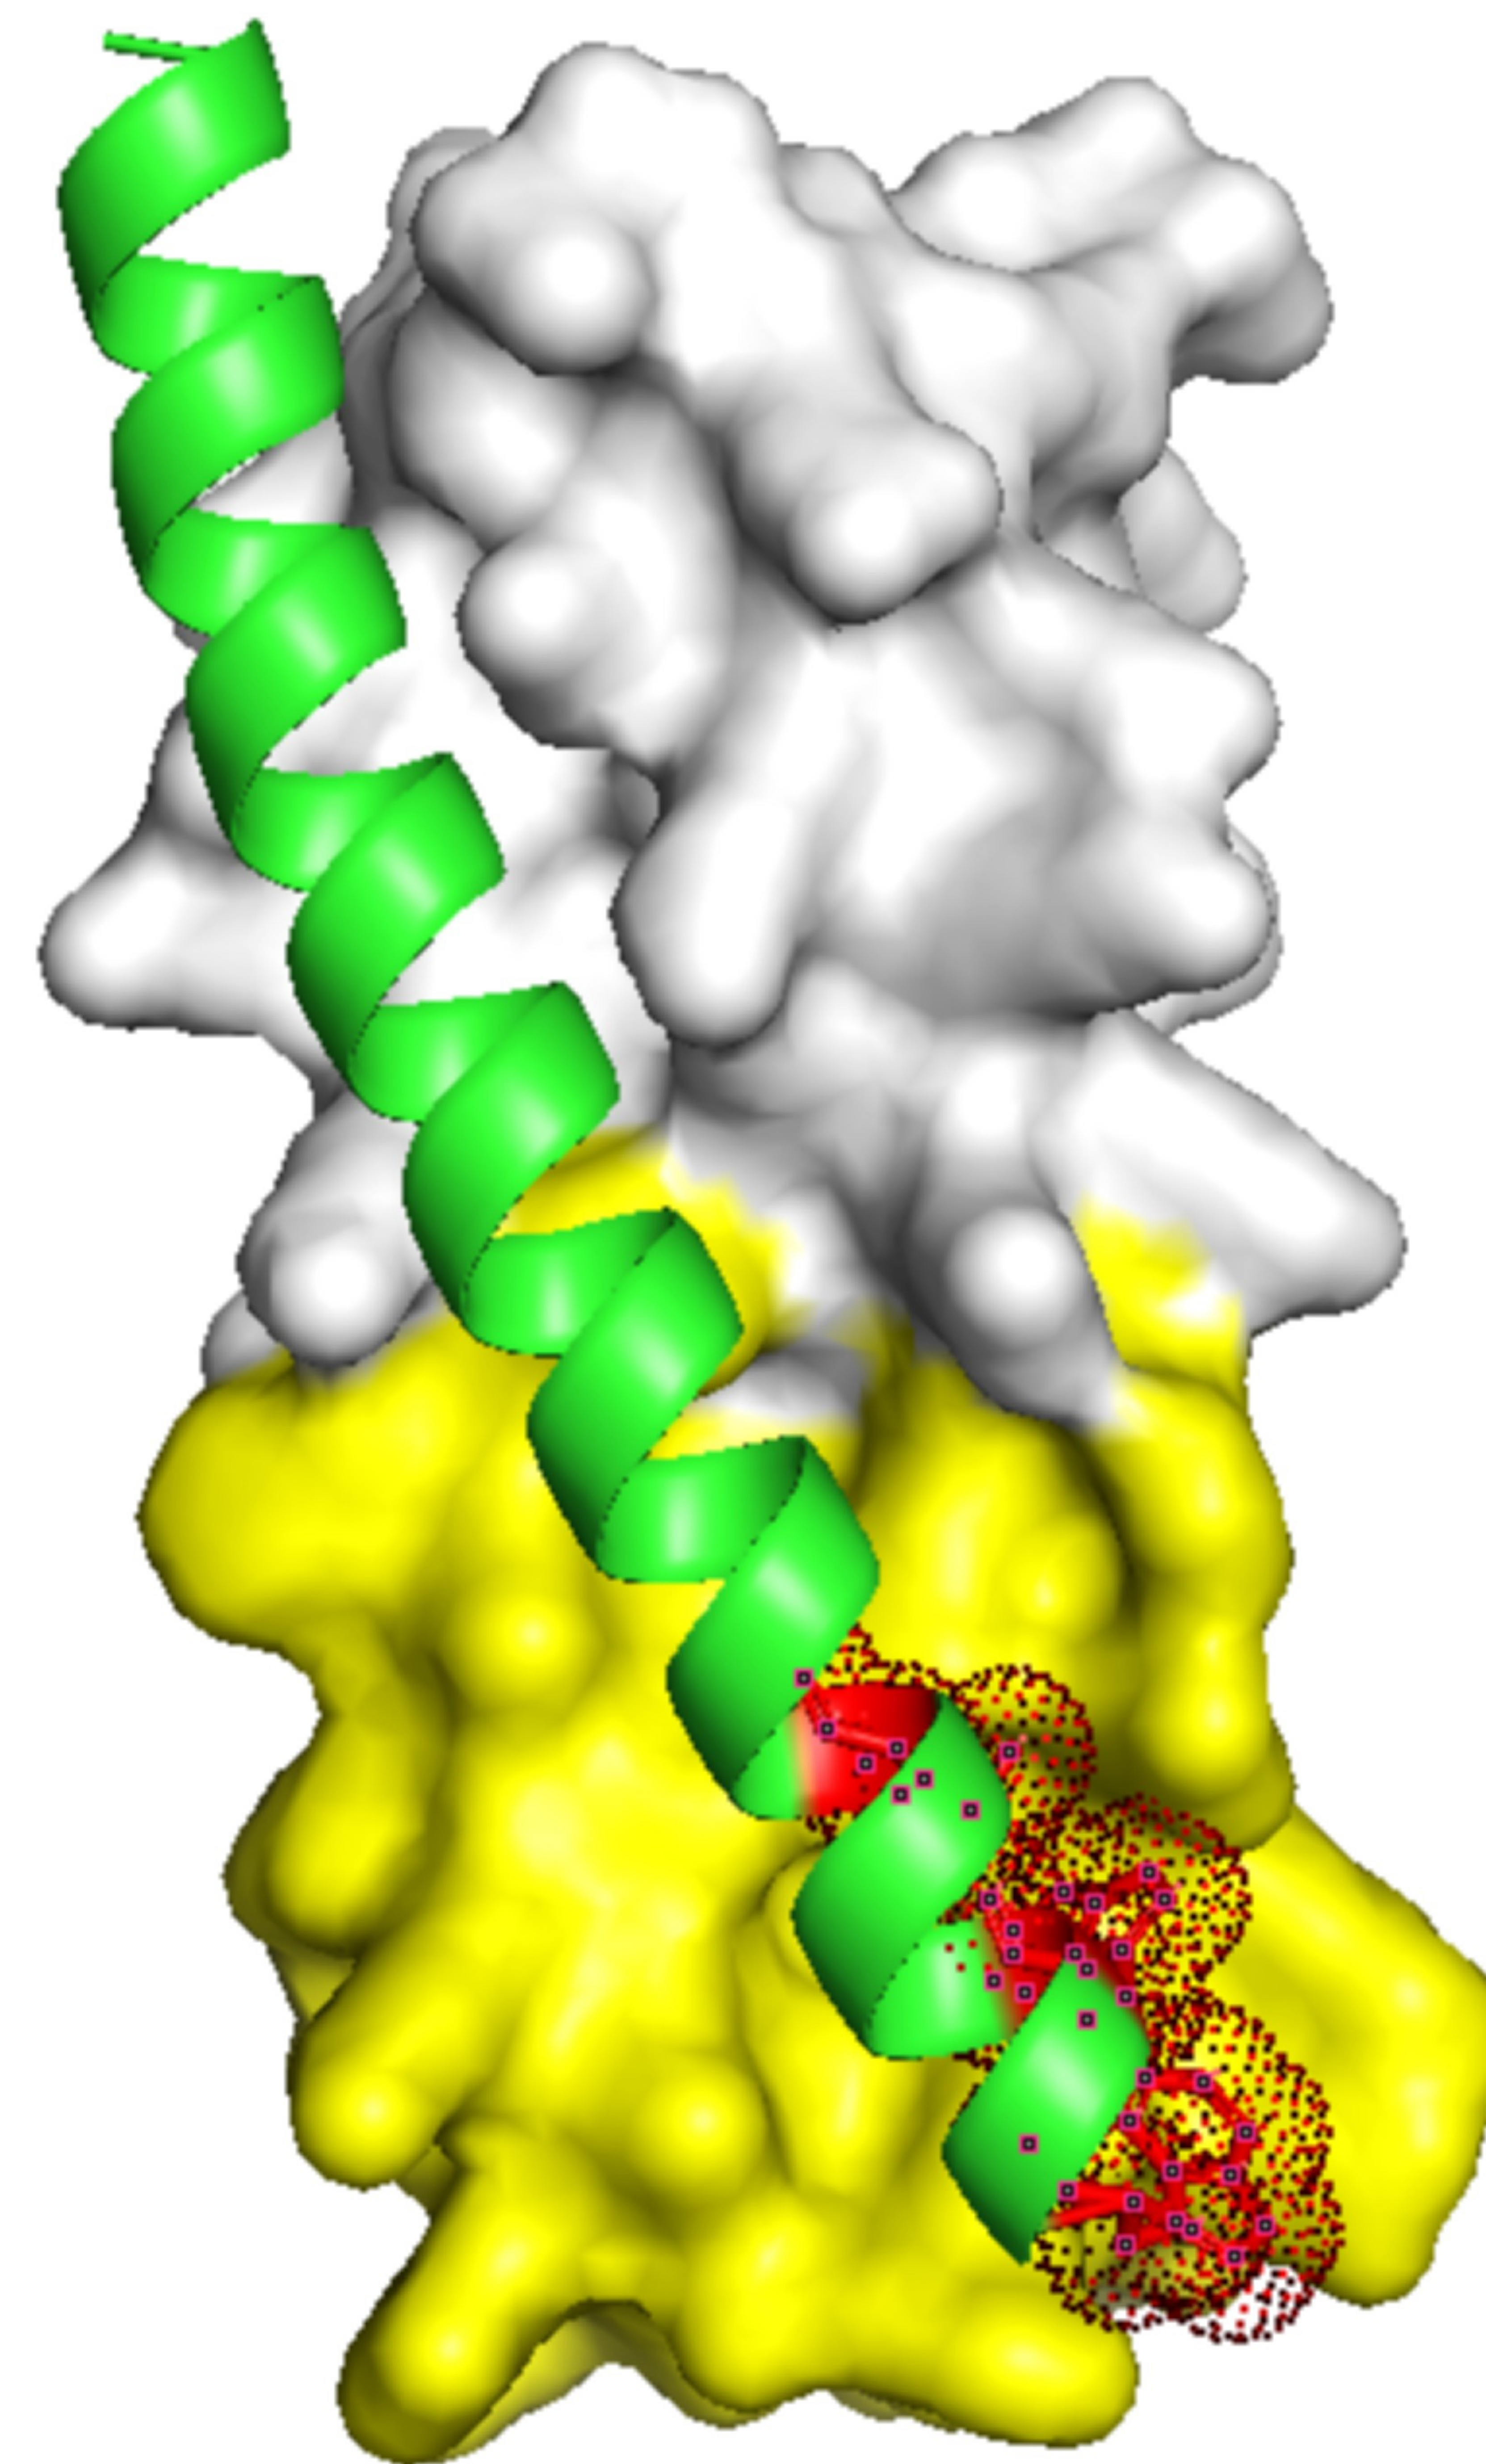

**IZNP03EK/C34**

Supplement: d4ob01620c3.pdf [file d4ob01620c3.pdf]

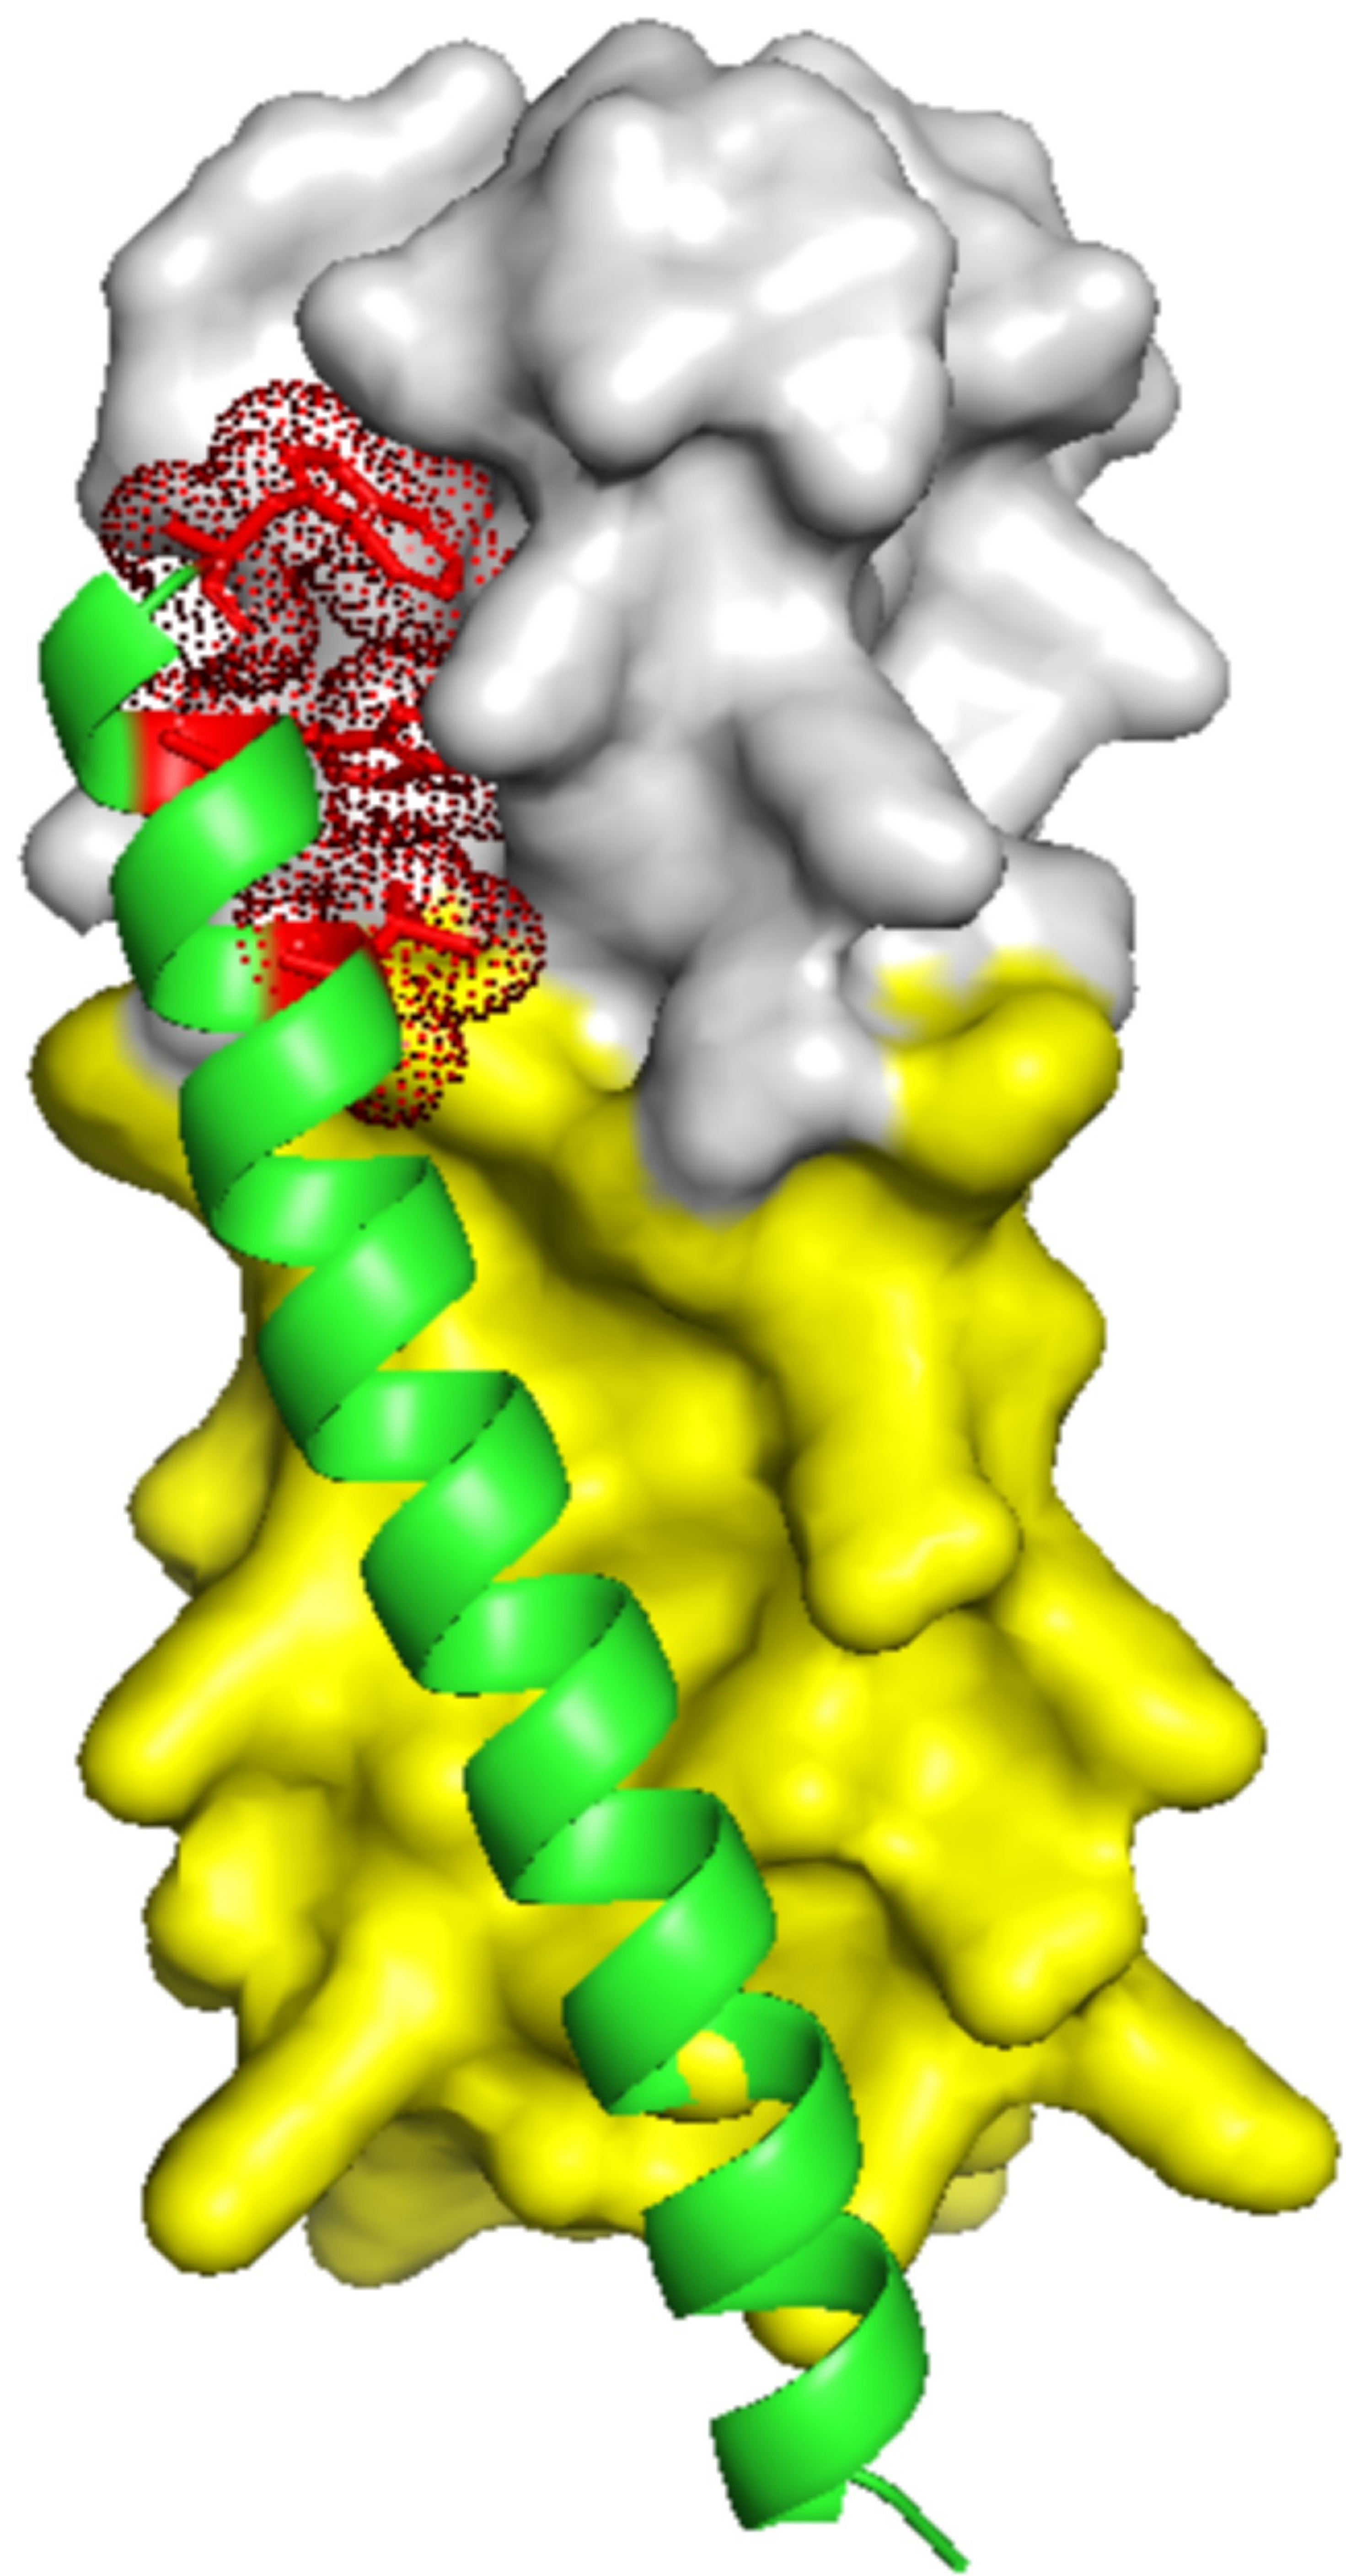

**IZNP01EQ/C34**

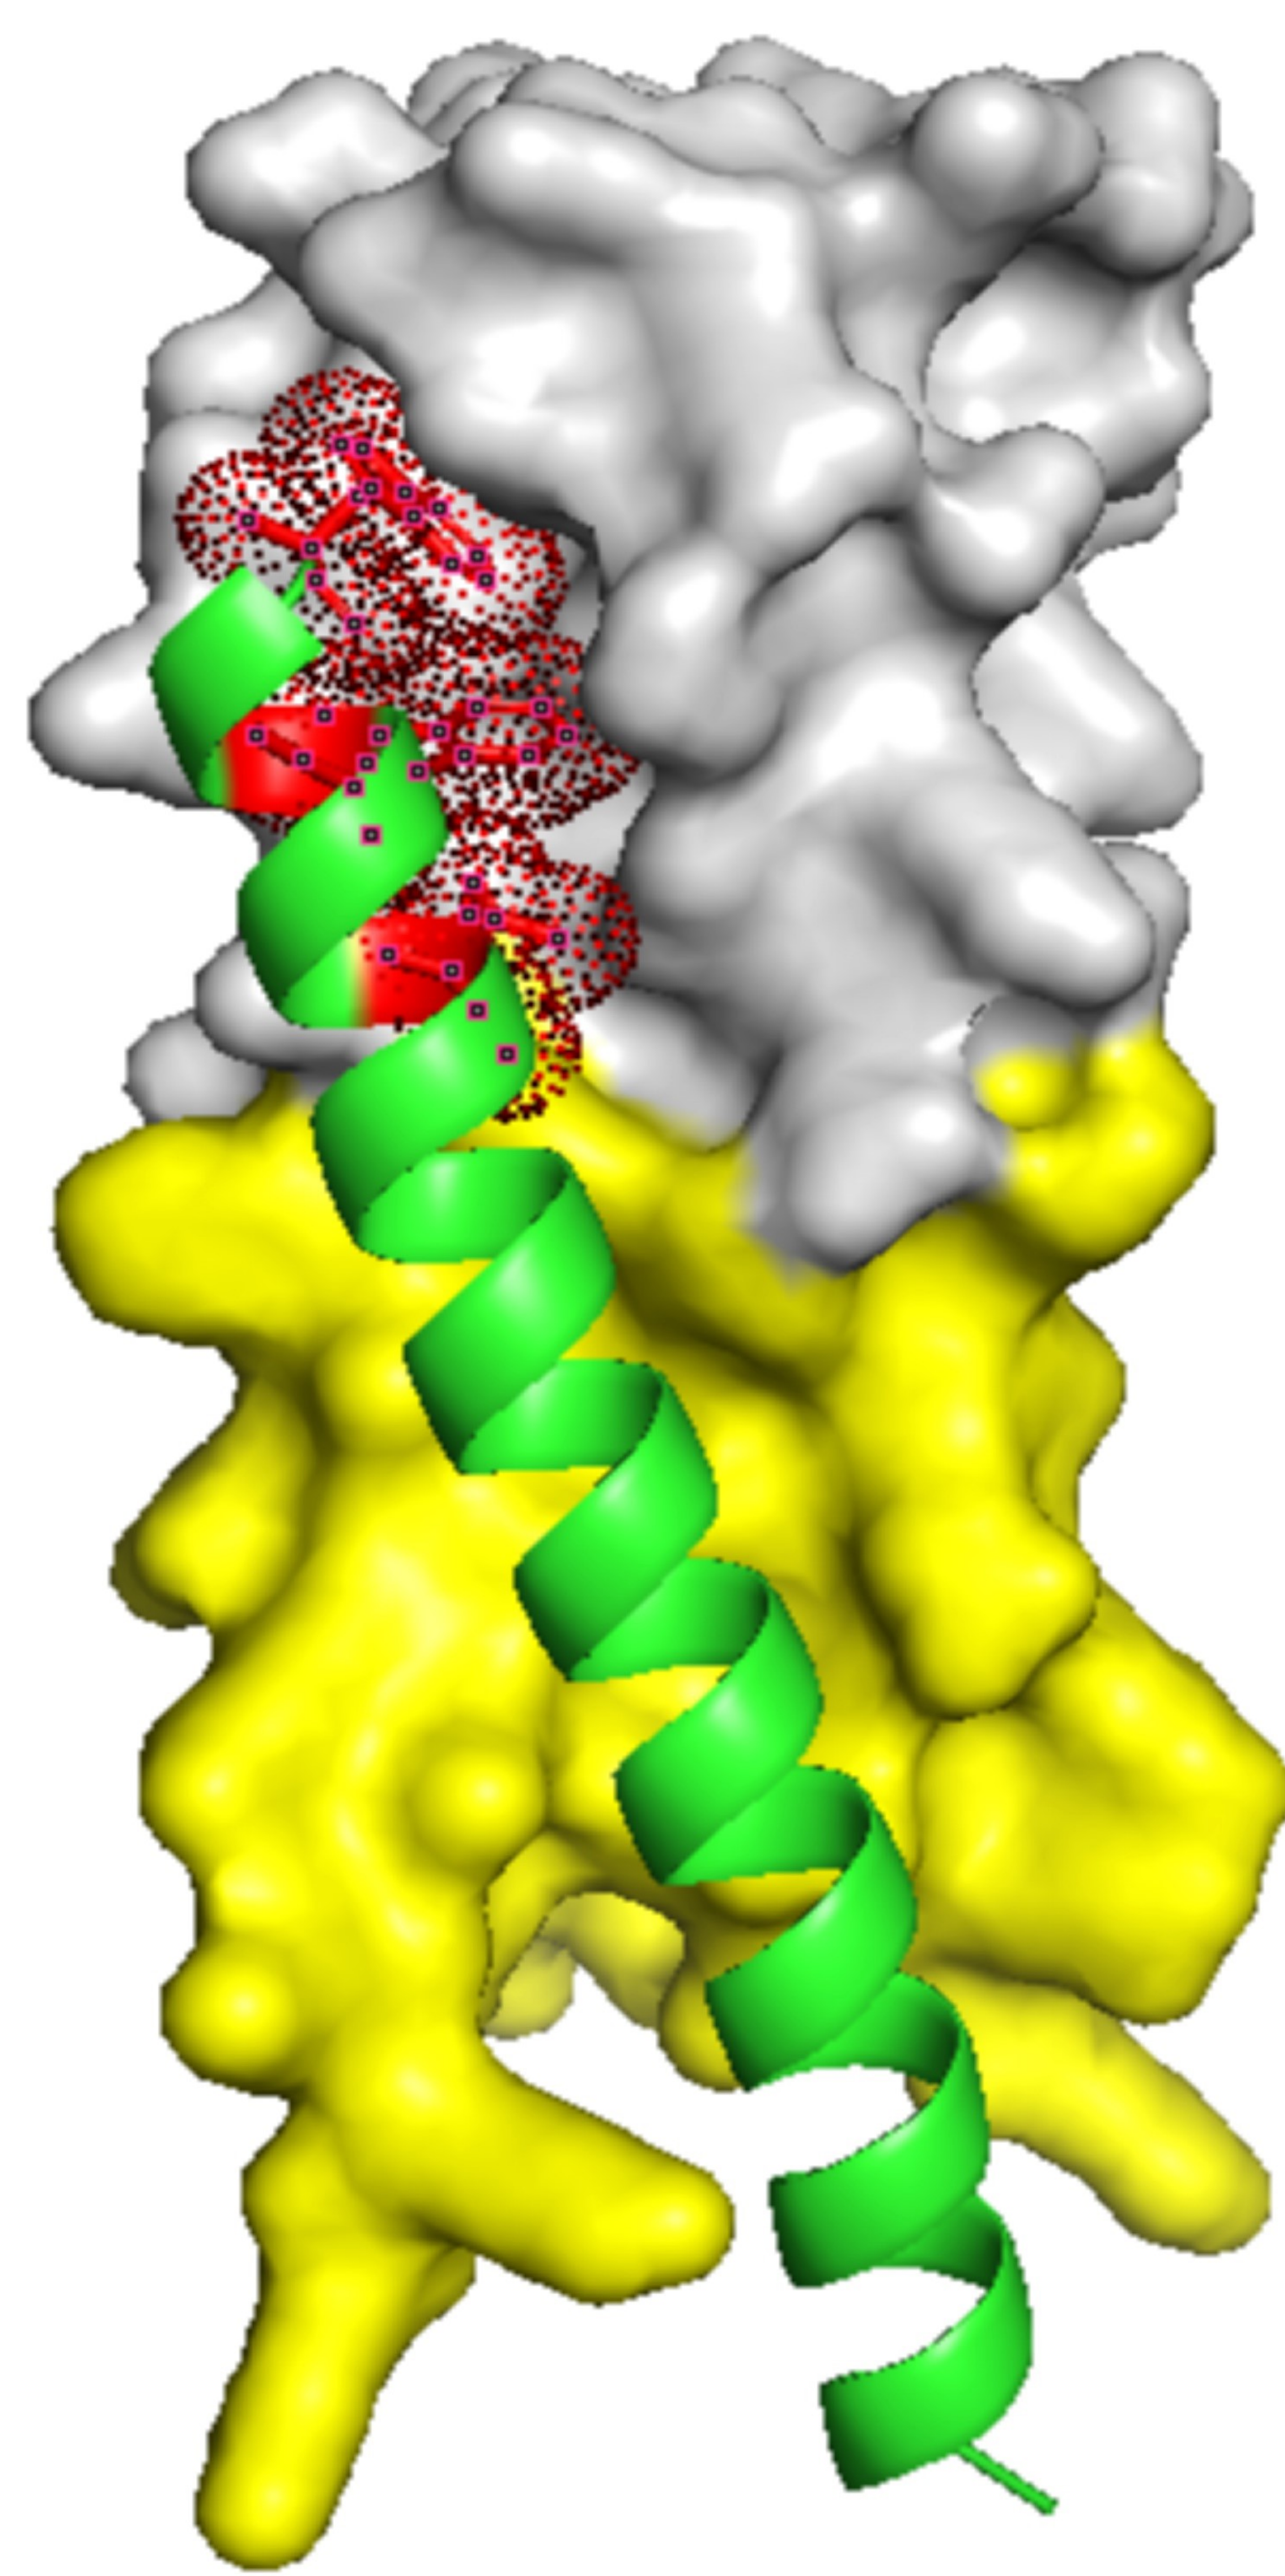

**IZNP02EQ/C34**

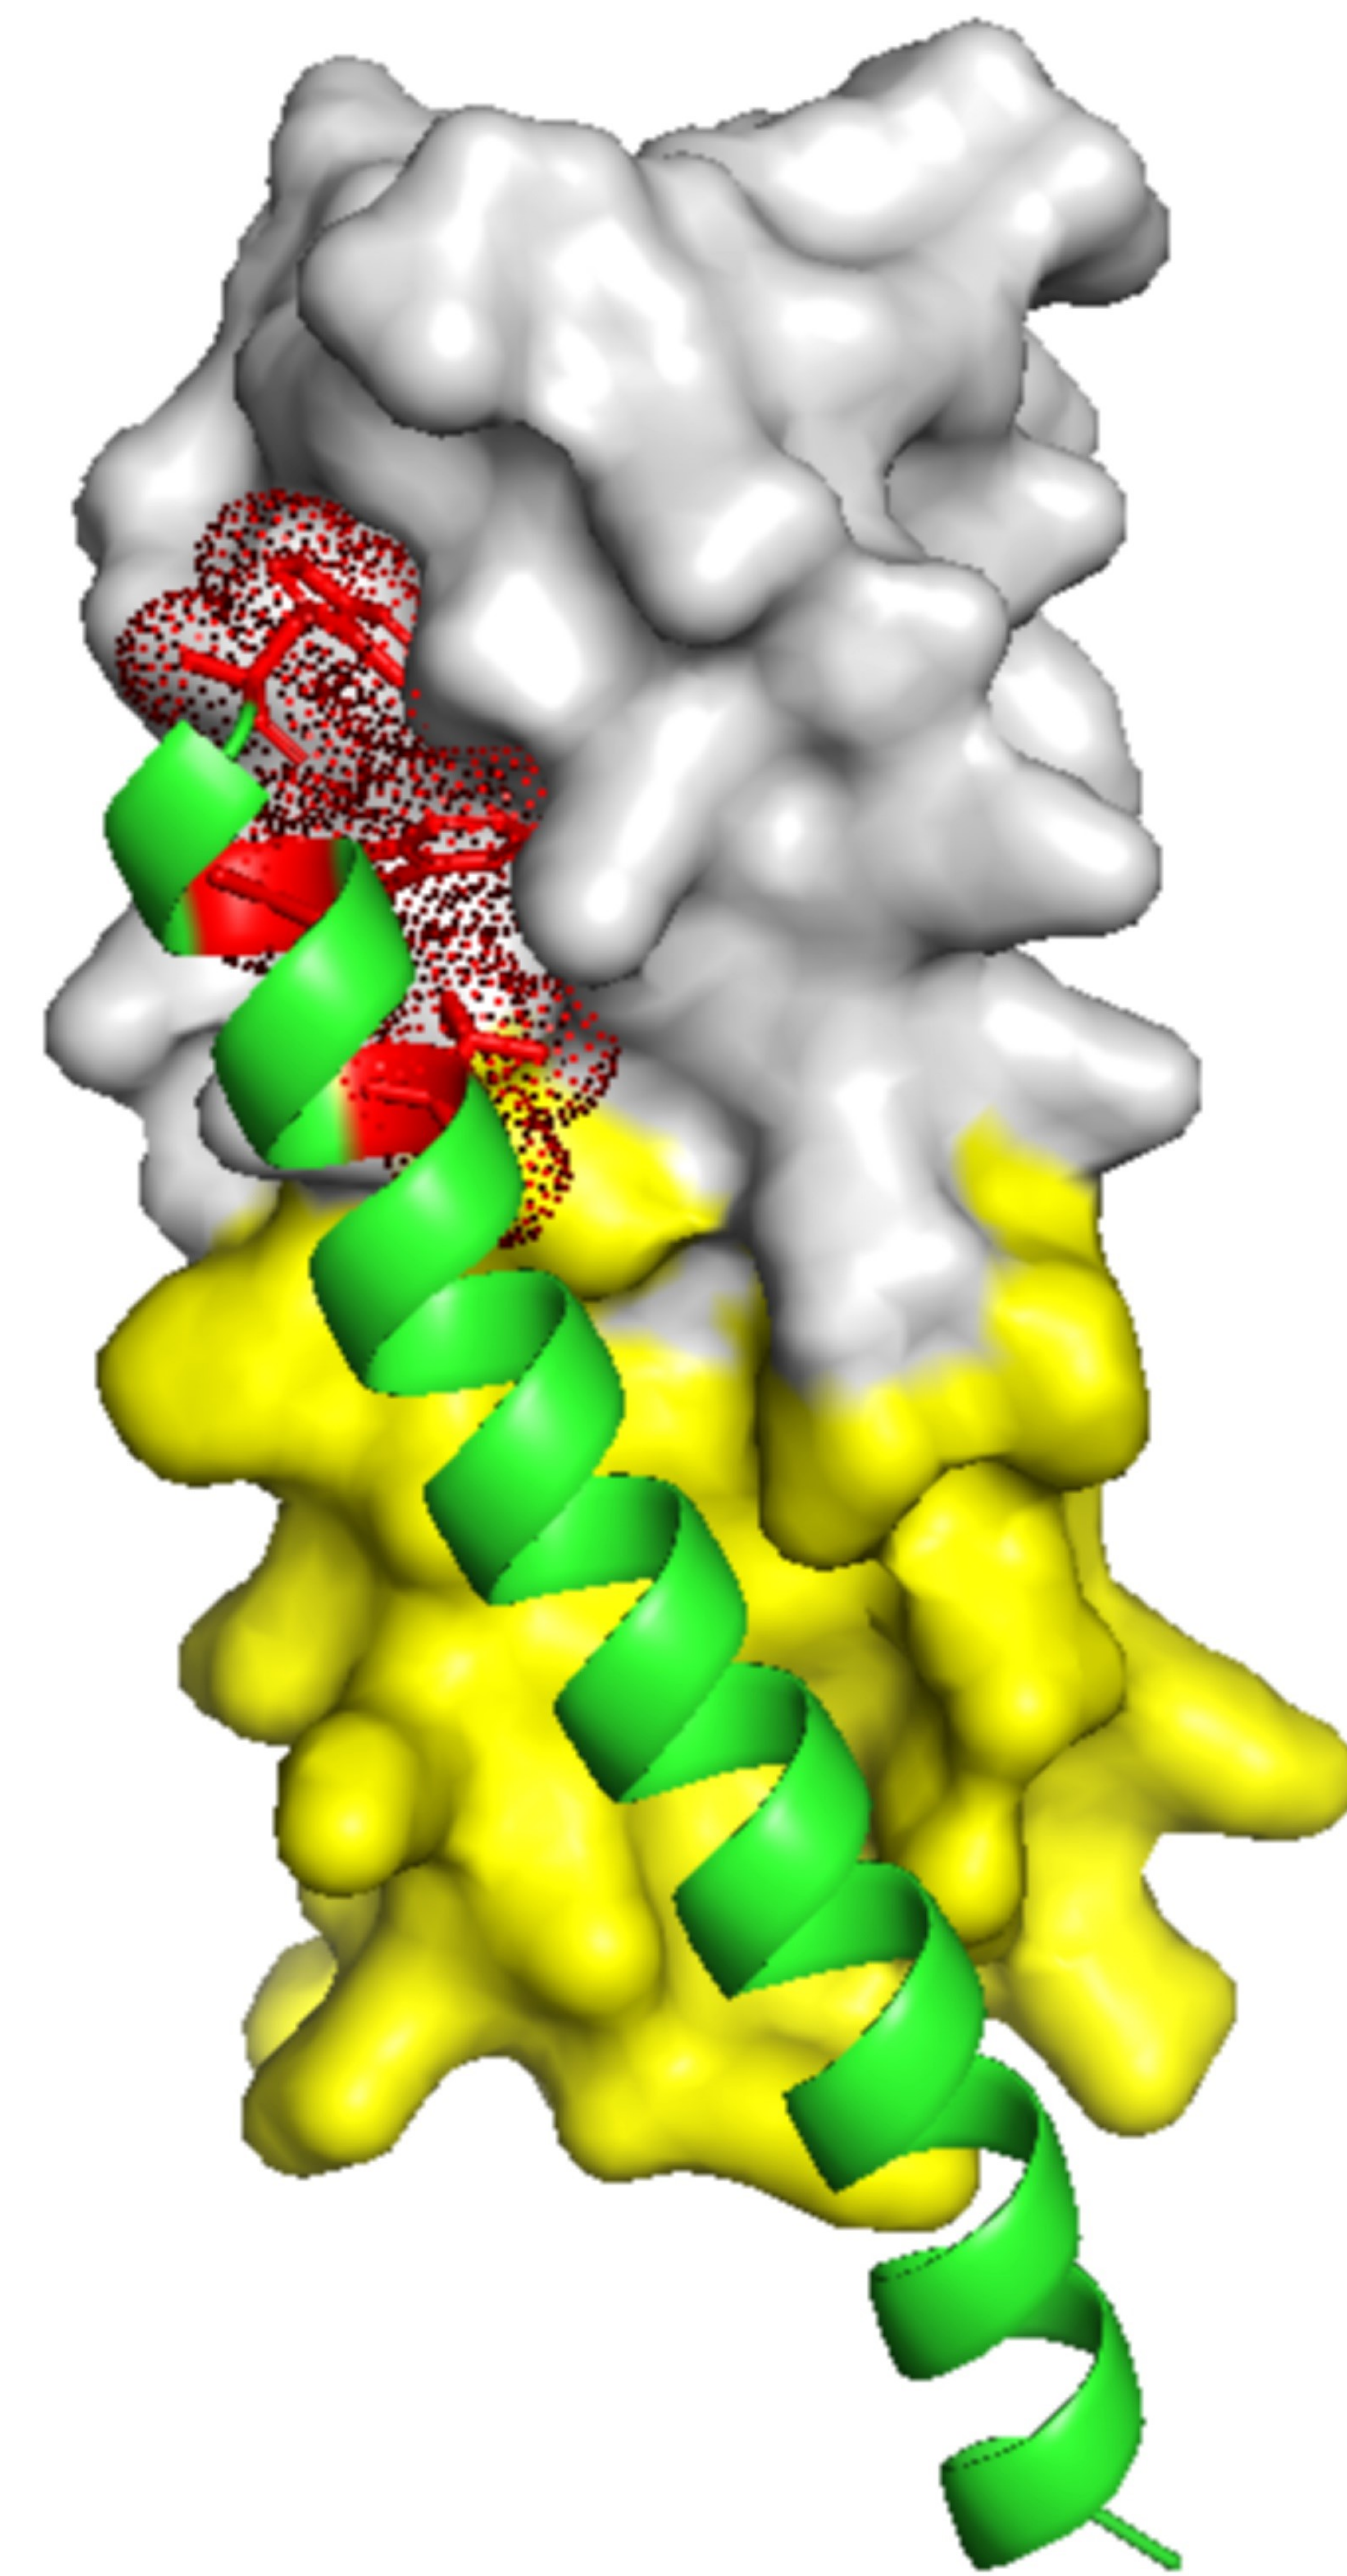

**IZNP03EQ/C34**

Supplement: d4ob01620c4.pdf [file d4ob01620c4.pdf]

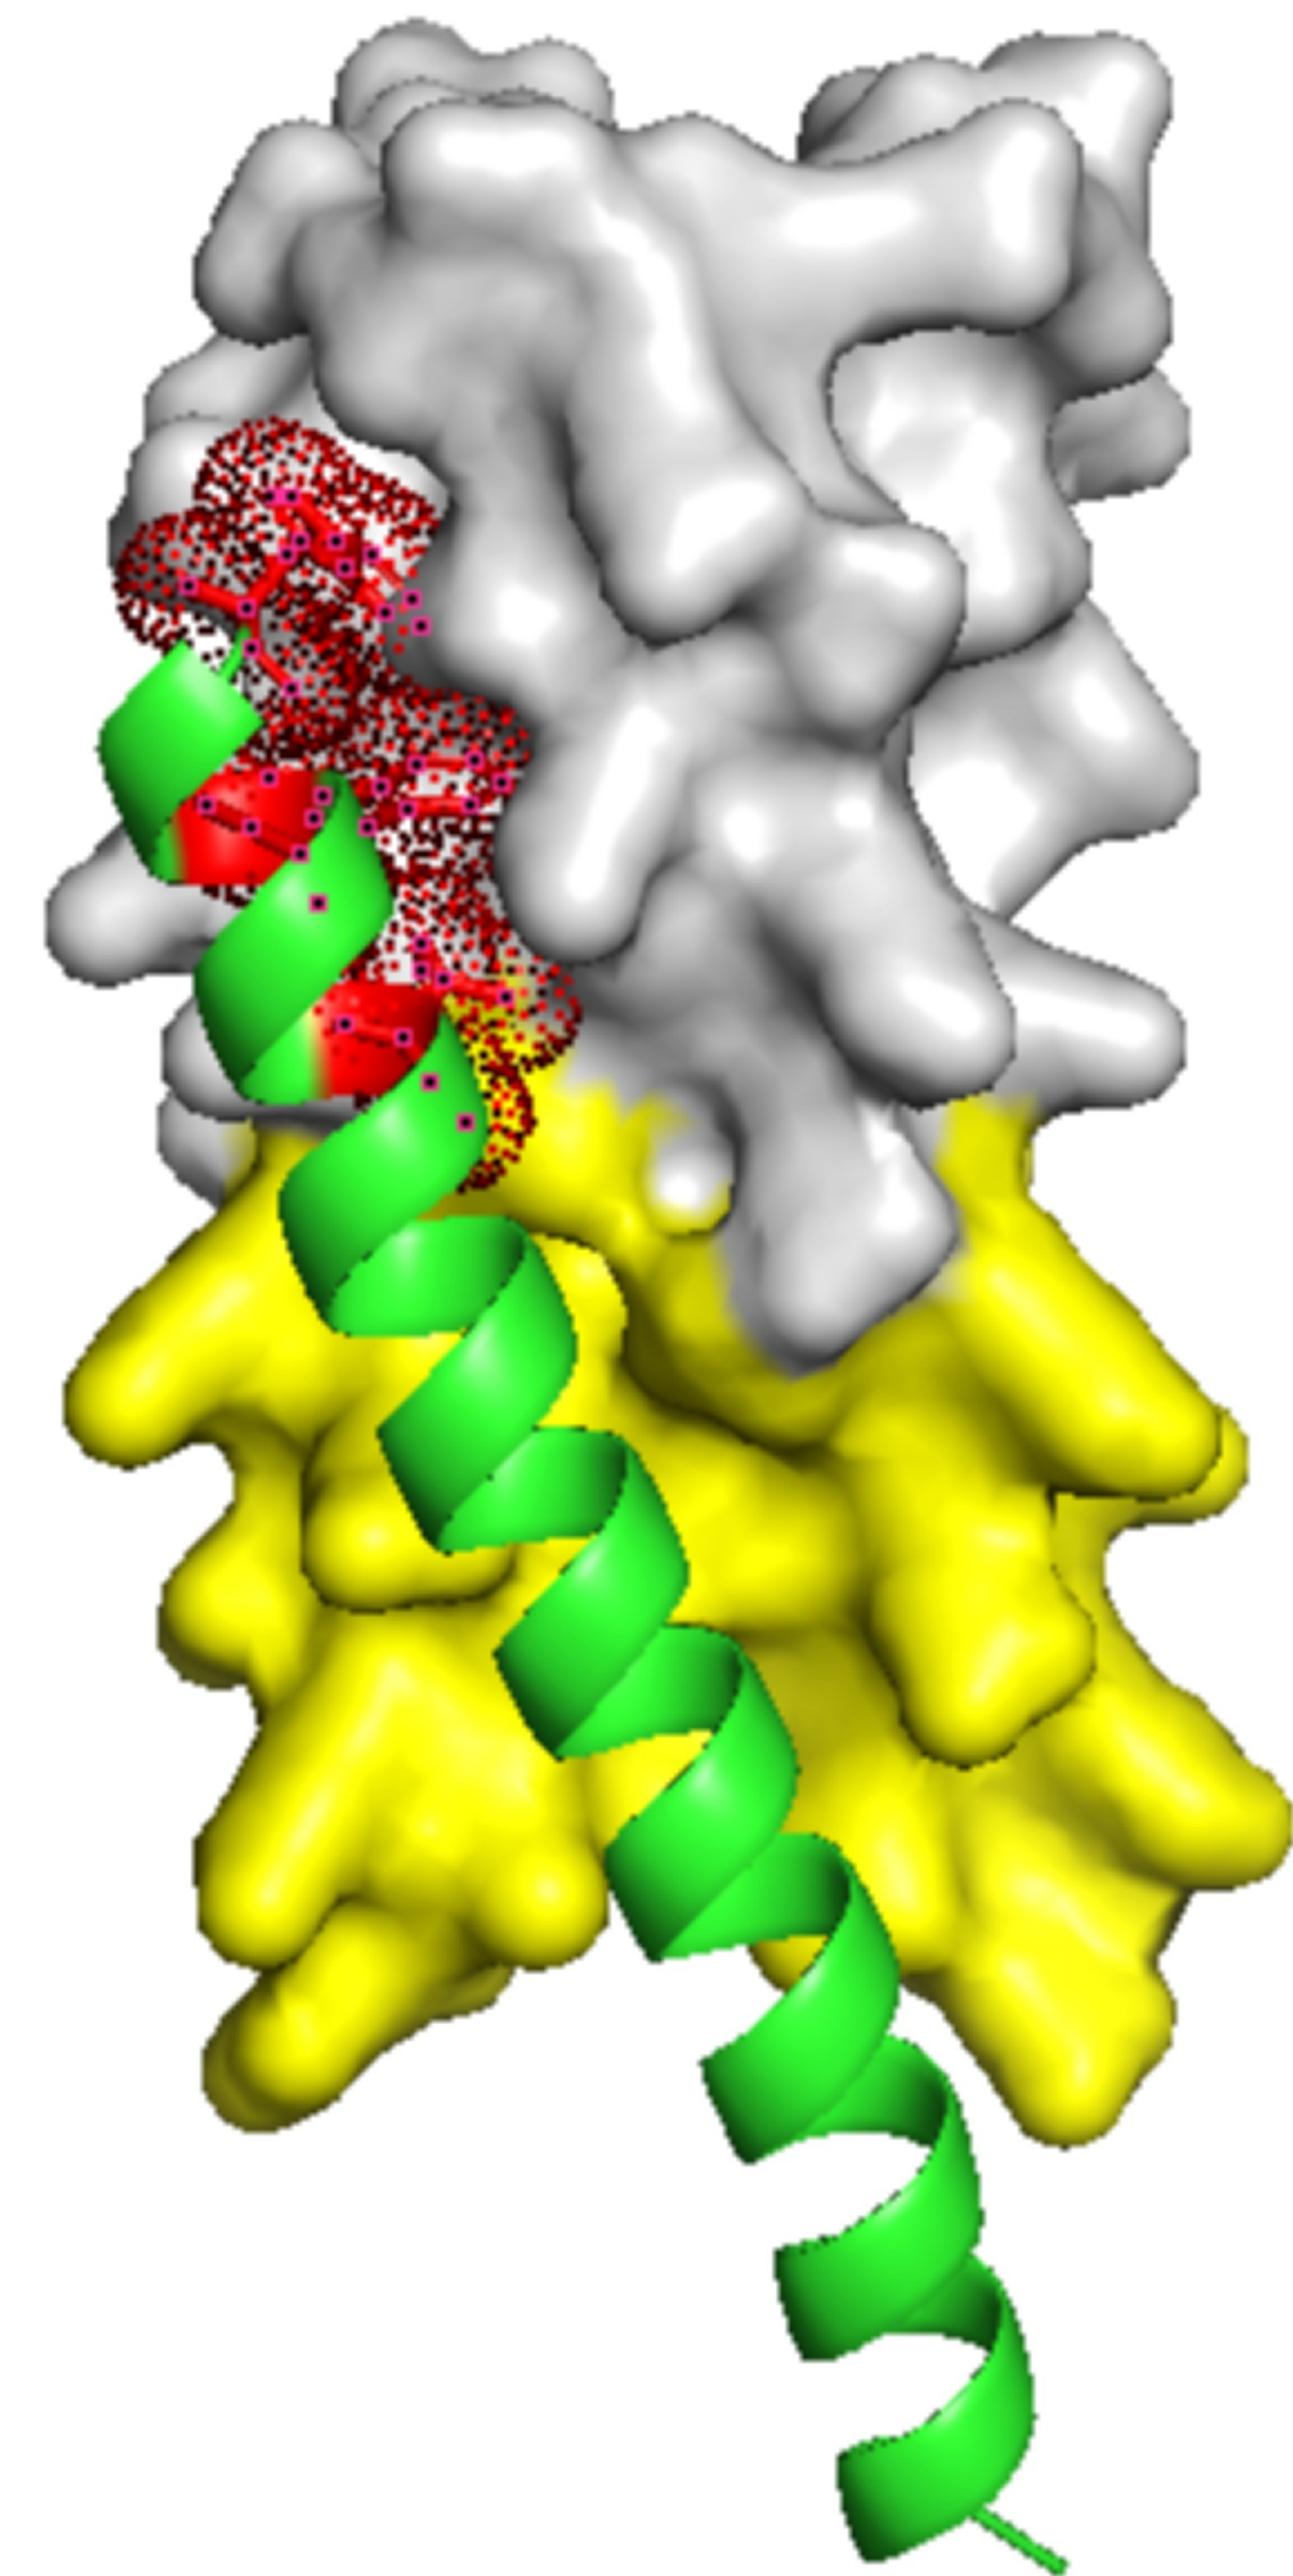

**IZNP04EQ/C34**

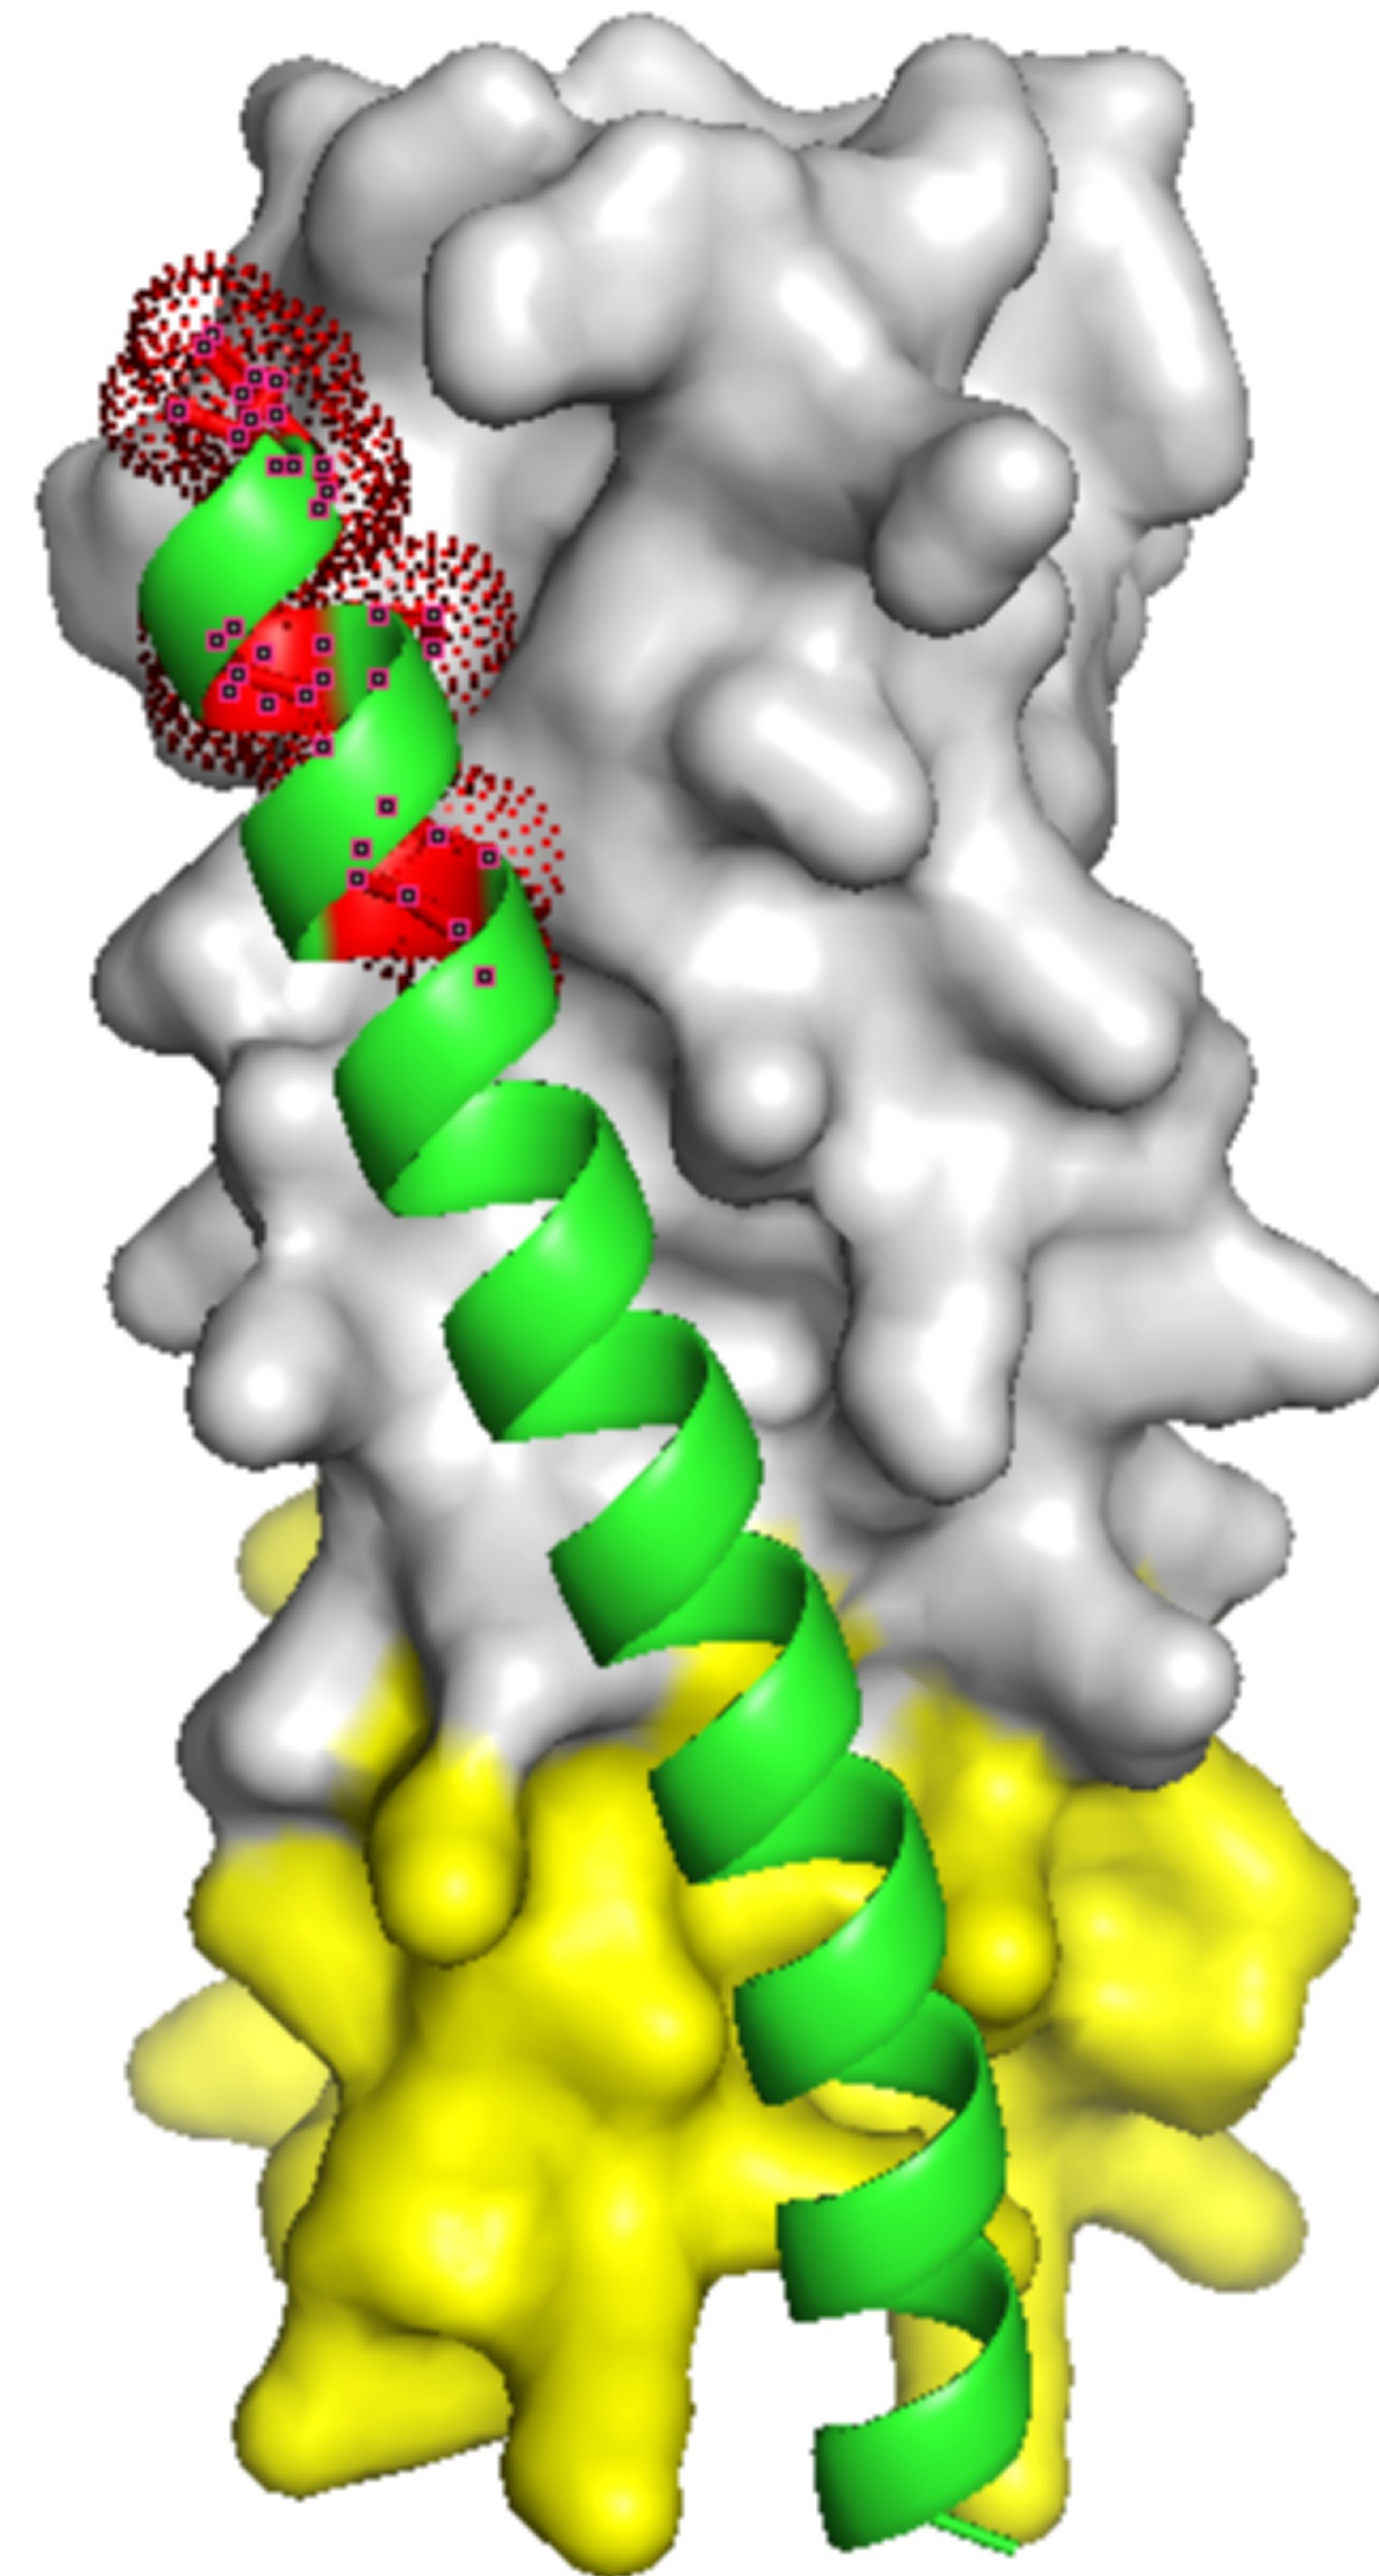

**IZNP02EQ+7/C34**

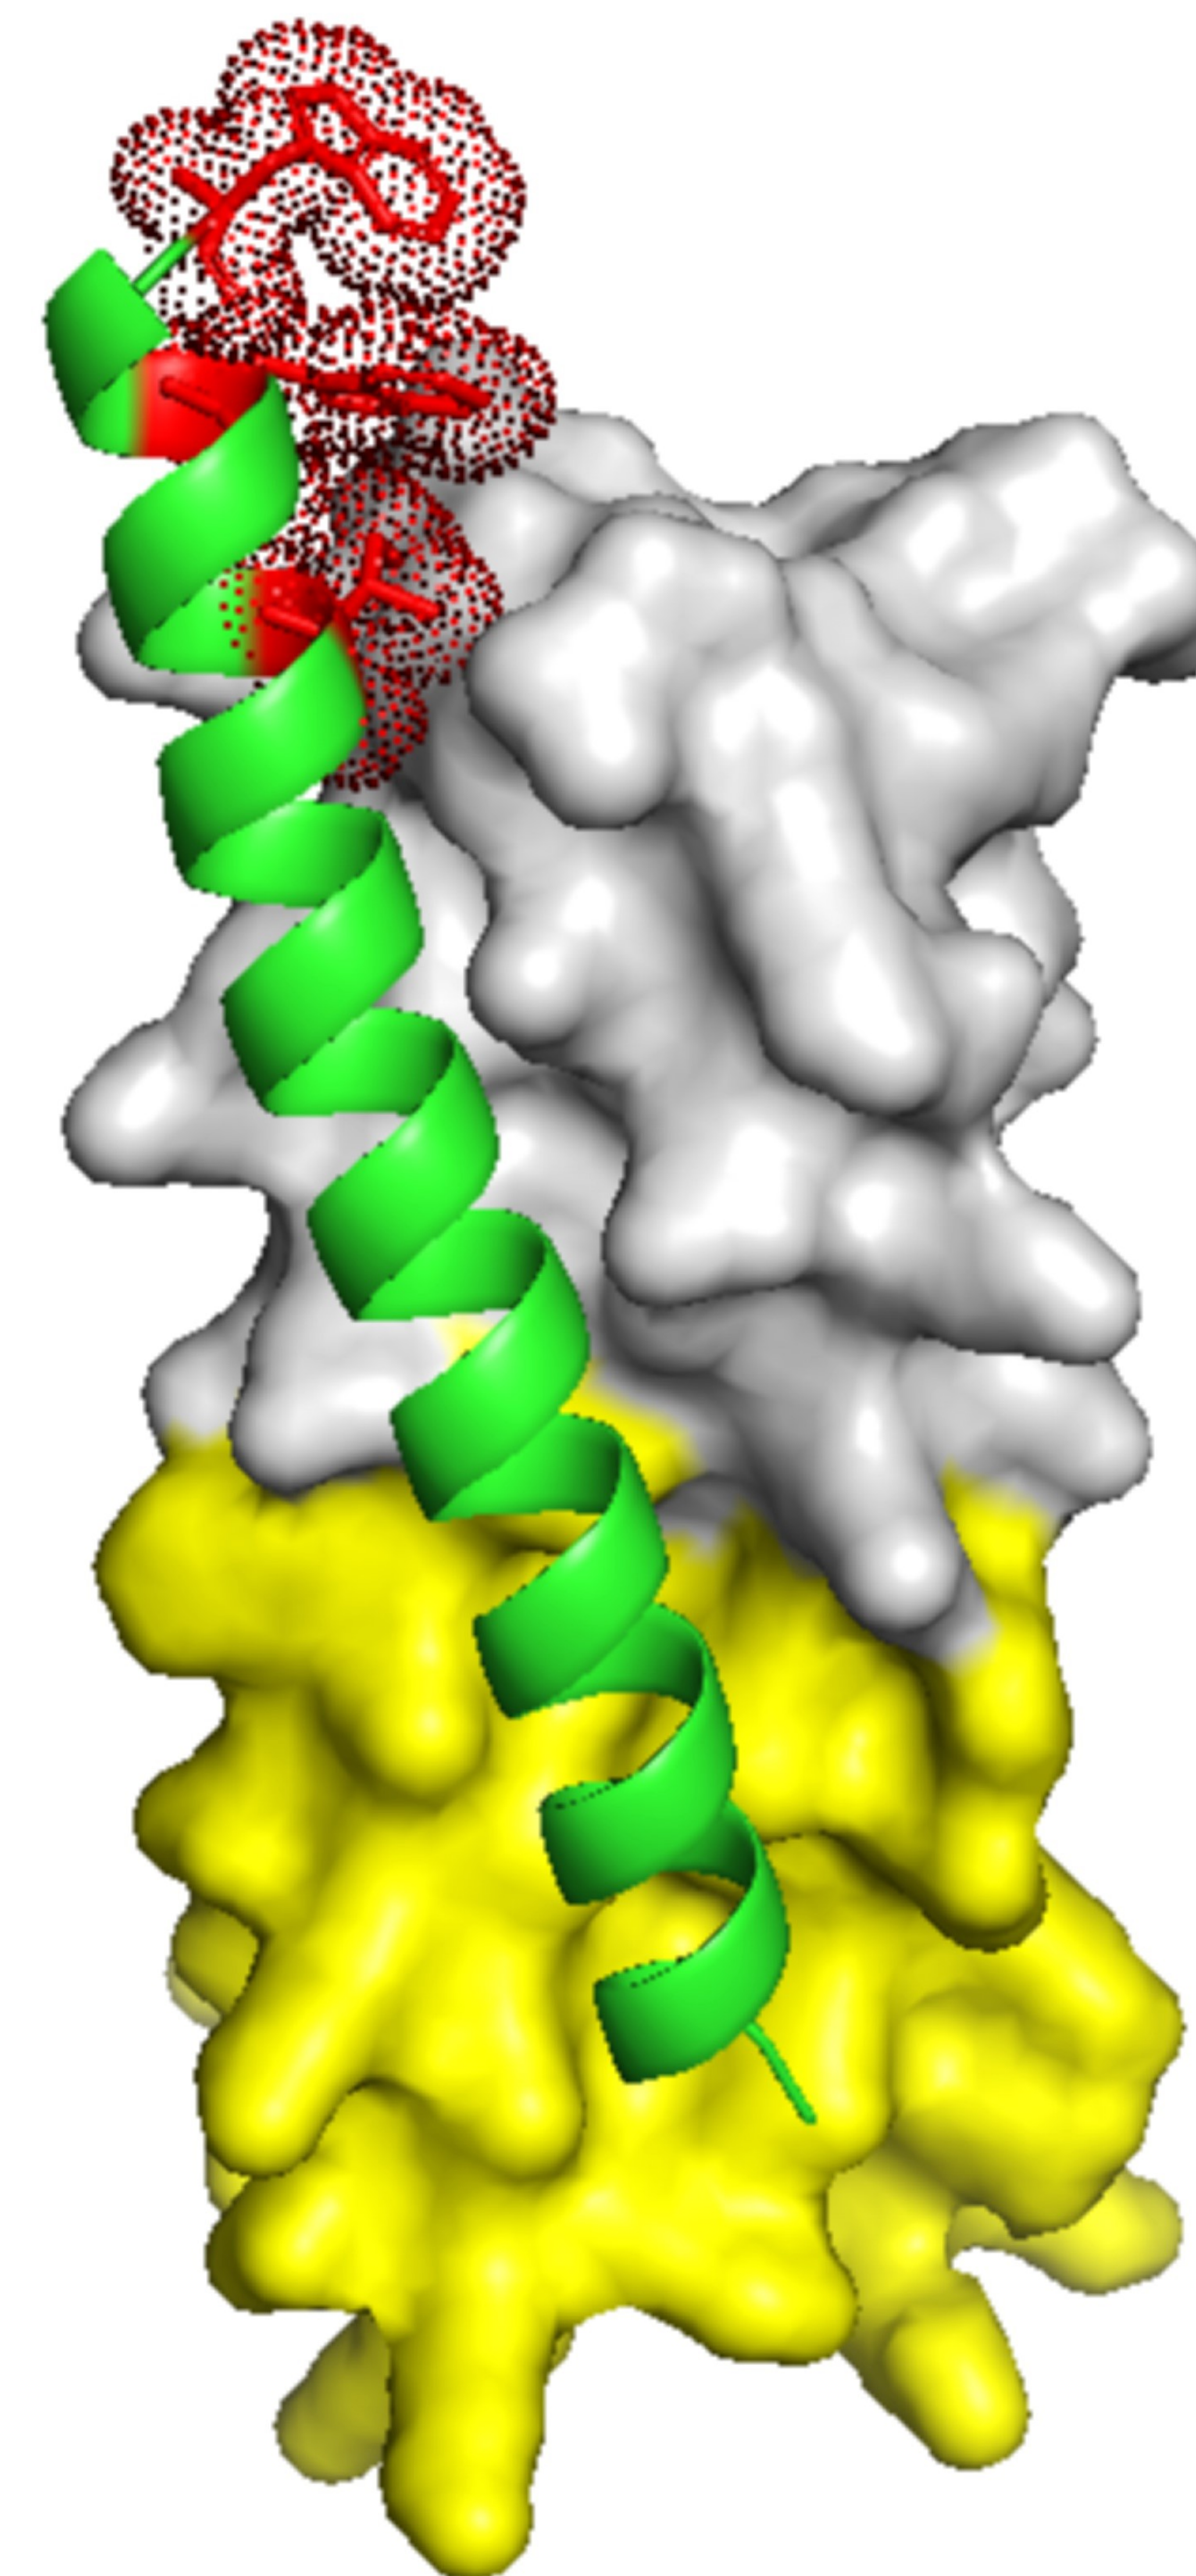

**IZNP02QE/C34**

Supplement: d4ob01620c5.pdf [file d4ob01620c5.pdf]
